# Supplementary material for: Preparation of a uranium metallacyclocumulene and its reactivity towards unsaturated organic molecules
Source: Royal Society of Chemistry journal article supplement (doi:10.1039/c7dt00396j), 2017-01-01
Supplement: c7dt00396j1.pdf [file c7dt00396j1.pdf]

*Supporting Information for*

# Preparation of a Uranium Metallacyclocumulene and Its Reactivity toward Unsaturated Organic Molecules

Lei Zhang,<sup>a</sup> Guohua Hou,<sup>a</sup> Guofu Zi,<sup>\*,a</sup> Wanjian Ding,<sup>\*,a</sup> and Marc D. Walter<sup>\*,b</sup>

<sup>a</sup>Department of Chemistry, Beijing Normal University, Beijing 100875, China

<sup>b</sup>Institut für Anorganische und Analytische Chemie, Technische Universität Braunschweig, Hagenring  
30, 38106 Braunschweig, Germany

## Table of Content

|                                 |           |
|---------------------------------|-----------|
| <b>1. Crystal parameters</b>    | <b>S2</b> |
| <b>2. Computational details</b> | <b>S4</b> |

# 1. Crystal parameters

**Table S1. Crystal Data and Experimental Parameters for Compounds 2-6**

| Compound                                                       | 2                                 | 3                                                 | 4                                   | 5                                                | 6·C <sub>6</sub> H <sub>14</sub>                 |
|----------------------------------------------------------------|-----------------------------------|---------------------------------------------------|-------------------------------------|--------------------------------------------------|--------------------------------------------------|
| Formula                                                        | C <sub>42</sub> H <sub>52</sub> U | C <sub>36</sub> H <sub>60</sub> Si <sub>2</sub> U | C <sub>49</sub> H <sub>57</sub> NSU | C <sub>55</sub> H <sub>74</sub> N <sub>2</sub> U | C <sub>64</sub> H <sub>82</sub> N <sub>2</sub> U |
| Fw                                                             | 794.86                            | 787.05                                            | 930.04                              | 1001.19                                          | 1117.34                                          |
| crystal system                                                 | tetragonal                        | monoclinic                                        | monoclinic                          | triclinic                                        | triclinic                                        |
| space group                                                    | <i>I</i> -42 <i>d</i>             | <i>C</i> 2/ <i>c</i>                              | <i>P</i> 2 <sub>1</sub> / <i>c</i>  | <i>P</i> (-1)                                    | <i>P</i> (-1)                                    |
| <i>a</i> (Å)                                                   | 24.935(16)                        | 10.817(9)                                         | 21.053(12)                          | 10.680(11)                                       | 10.919(1)                                        |
| <i>b</i> (Å)                                                   | 24.935(16)                        | 18.009(9)                                         | 11.026(6)                           | 11.535(12)                                       | 14.294(1)                                        |
| <i>c</i> (Å)                                                   | 11.671(11)                        | 19.810(12)                                        | 18.894(10)                          | 20.41(3)                                         | 18.058(1)                                        |
| $\alpha$ (deg)                                                 | 90                                | 90                                                | 90                                  | 100.04(2)                                        | 76.41(1)                                         |
| $\beta$ (deg)                                                  | 90                                | 106.86(2)                                         | 107.47(1)                           | 92.65(2)                                         | 88.11(1)                                         |
| $\gamma$ (deg)                                                 | 90                                | 90                                                | 90                                  | 99.24(1)                                         | 86.40(1)                                         |
| <i>V</i> (Å <sup>3</sup> )                                     | 7256(12)                          | 3790(4)                                           | 4184(4)                             | 2437(5)                                          | 2733.7(2)                                        |
| <i>Z</i>                                                       | 8                                 | 4                                                 | 4                                   | 2                                                | 2                                                |
| <i>D</i> <sub>calc</sub> (g/cm <sup>3</sup> )                  | 1.455                             | 1.379                                             | 1.477                               | 1.365                                            | 1.357                                            |
| $\mu$ (Mo/K $\alpha$ ) <sub>calc</sub> (cm <sup>-1</sup> )     | 4.500                             | 4.366                                             | 3.963                               | 3.367                                            | 3.009                                            |
| size (mm)                                                      | 0.20 × 0.20 × 0.20                | 0.20 × 0.20 × 0.20                                | 0.20 × 0.20 × 0.20                  | 0.15 × 0.10 × 0.10                               | 0.15 × 0.20 × 0.20                               |
| <i>F</i> (000)                                                 | 3168                              | 1584                                              | 1864                                | 1020                                             | 1144                                             |
| 2 $\theta$ range (deg)                                         | 3.27 to 55.46                     | 4.19 to 55.20                                     | 4.06 to 55.38                       | 3.64 to 50.50                                    | 6.58 to 59.94                                    |
| no. of reflns, collected                                       | 24779                             | 11879                                             | 27389                               | 12491                                            | 25416                                            |
| no of obsd reflns                                              | 4218                              | 4322                                              | 9648                                | 8494                                             | 13062                                            |
| no of variables                                                | 202                               | 186                                               | 481                                 | 535                                              | 602                                              |
| abs corr ( <i>T</i> <sub>max</sub> , <i>T</i> <sub>min</sub> ) | 0.75, 0.55                        | 0.75, 0.51                                        | 0.75, 0.44                          | 0.75, 0.56                                       | 1.00, 0.67                                       |
| <i>R</i>                                                       | 0.053                             | 0.048                                             | 0.067                               | 0.072                                            | 0.047                                            |
| <i>R</i> <sub>w</sub>                                          | 0.100                             | 0.098                                             | 0.155                               | 0.180                                            | 0.097                                            |
| <i>R</i> <sub>all</sub>                                        | 0.077                             | 0.065                                             | 0.091                               | 0.084                                            | 0.058                                            |
| Gof                                                            | 0.97                              | 0.95                                              | 1.02                                | 1.12                                             | 1.05                                             |
| CCDC                                                           | 1529308                           | 1529313                                           | 1529307                             | 1529309                                          | 1529312                                          |

**Table S2. Crystal Data and Experimental Parameters for Compounds 7-10**

| Compound                                                       | <b>7</b>                                         | <b>8</b>                                         | <b>9·2C<sub>6</sub>H<sub>6</sub></b>             | <b>10·0.5C<sub>6</sub>H<sub>14</sub></b>                       |
|----------------------------------------------------------------|--------------------------------------------------|--------------------------------------------------|--------------------------------------------------|----------------------------------------------------------------|
| Formula                                                        | C <sub>49</sub> H <sub>62</sub> N <sub>2</sub> U | C <sub>54</sub> H <sub>72</sub> O <sub>2</sub> U | C <sub>80</sub> H <sub>84</sub> O <sub>2</sub> U | C <sub>72</sub> H <sub>101</sub> S <sub>2</sub> U <sub>2</sub> |
| Fw                                                             | 917.03                                           | 991.14                                           | 1315.50                                          | 1506.70                                                        |
| crystal system                                                 | triclinic                                        | triclinic                                        | triclinic                                        | triclinic                                                      |
| space group                                                    | <i>P</i> (-1)                                    | <i>P</i> (-1)                                    | <i>P</i> (-1)                                    | <i>P</i> (-1)                                                  |
| <i>a</i> (Å)                                                   | 10.997(15)                                       | 10.426(7)                                        | 11.734(8)                                        | 11.959(13)                                                     |
| <i>b</i> (Å)                                                   | 12.383(17)                                       | 11.296(8)                                        | 14.198(10)                                       | 14.189(15)                                                     |
| <i>c</i> (Å)                                                   | 15.72(2)                                         | 22.085(16)                                       | 21.577(15)                                       | 20.45(2)                                                       |
| $\alpha$ (deg)                                                 | 91.91(2)                                         | 94.73(1)                                         | 74.35(1)                                         | 104.94(2)                                                      |
| $\beta$ (deg)                                                  | 90.78(2)                                         | 102.02(1)                                        | 79.24(1)                                         | 96.01(2)                                                       |
| $\gamma$ (deg)                                                 | 97.89(2)                                         | 102.84(1)                                        | 86.69(1)                                         | 94.40(2)                                                       |
| <i>V</i> (Å <sup>3</sup> )                                     | 2119(5)                                          | 2458(3)                                          | 3400(4)                                          | 3315(6)                                                        |
| <i>Z</i>                                                       | 2                                                | 2                                                | 2                                                | 2                                                              |
| <i>D</i> <sub>calc</sub> (g/cm <sup>3</sup> )                  | 1.437                                            | 1.339                                            | 1.285                                            | 1.509                                                          |
| $\mu$ (Mo/K $\alpha$ ) <sub>calc</sub> (cm <sup>-1</sup> )     | 3.864                                            | 3.339                                            | 2.431                                            | 4.980                                                          |
| size (mm)                                                      | 0.10 × 0.10 × 0.10                               | 0.20 × 0.20 × 0.20                               | 0.20 × 0.20 × 0.20                               | 0.20 × 0.20 × 0.15                                             |
| <i>F</i> (000)                                                 | 924                                              | 1008                                             | 1344                                             | 1498                                                           |
| 2 $\theta$ range (deg)                                         | 3.32 to 55.61                                    | 3.73 to 50.50                                    | 2.98 to 55.01                                    | 3.15 to 55.73                                                  |
| no. of reflns, collected                                       | 13378                                            | 13040                                            | 22689                                            | 22161                                                          |
| no of obsd reflns                                              | 9523                                             | 8627                                             | 15351                                            | 15308                                                          |
| no of variables                                                | 483                                              | 526                                              | 794                                              | 710                                                            |
| abs corr ( <i>T</i> <sub>max</sub> , <i>T</i> <sub>min</sub> ) | 0.75, 0.44                                       | 0.75, 0.61                                       | 0.75, 0.61                                       | 0.75, 0.48                                                     |
| <i>R</i>                                                       | 0.068                                            | 0.063                                            | 0.045                                            | 0.052                                                          |
| <i>R</i> <sub>w</sub>                                          | 0.159                                            | 0.168                                            | 0.096                                            | 0.120                                                          |
| <i>R</i> <sub>all</sub>                                        | 0.116                                            | 0.074                                            | 0.069                                            | 0.087                                                          |
| Gof                                                            | 0.95                                             | 1.01                                             | 0.98                                             | 0.96                                                           |
| CCDC                                                           | 1529306                                          | 1529311                                          | 1529310                                          | 1529314                                                        |

## 2. Computational details

**Table S3.** The optimized Cartesian Coordinates (in Å) and structures (the hydrogen atoms omitted for clarity) of stationary points for the isomerization of **2**, obtained with B3PW91-PCM method.

| Species  | Cartesian coordinates |           |           |           |  |
|----------|-----------------------|-----------|-----------|-----------|--|
| <b>2</b> | C                     | 16.647965 | 20.098854 | 11.000783 |  |
|          | C                     | 16.167171 | 21.401538 | 11.310215 |  |
|          | H                     | 15.287991 | 21.859080 | 10.870222 |  |
|          | C                     | 16.921833 | 21.957764 | 12.380417 |  |
|          | C                     | 17.945652 | 21.016127 | 12.674712 |  |
|          | H                     | 18.693772 | 21.112748 | 13.453224 |  |
|          | C                     | 17.773067 | 19.881024 | 11.837137 |  |
|          | H                     | 18.367649 | 18.977004 | 11.879525 |  |
|          | C                     | 15.902961 | 19.073808 | 10.150264 |  |
|          | C                     | 14.525690 | 18.834046 | 10.806539 |  |
|          | H                     | 14.640159 | 18.484998 | 11.839114 |  |
|          | H                     | 13.963860 | 18.073897 | 10.248548 |  |
|          | H                     | 13.926913 | 19.751091 | 10.825797 |  |
|          | C                     | 16.641507 | 17.730218 | 10.105644 |  |
|          | H                     | 17.635009 | 17.822419 | 9.655731  |  |
|          | H                     | 16.071680 | 17.009130 | 9.507565  |  |
|          | H                     | 16.762474 | 17.307358 | 11.109594 |  |
|          | C                     | 15.675722 | 19.577148 | 8.716831  |  |
|          | H                     | 15.151709 | 20.538928 | 8.710715  |  |
|          | H                     | 15.066951 | 18.861359 | 8.149832  |  |
|          | H                     | 16.625384 | 19.699591 | 8.183343  |  |
|          | C                     | 16.475620 | 23.124748 | 13.258207 |  |
|          | C                     | 15.907608 | 24.293990 | 12.440589 |  |
|          | H                     | 15.093315 | 23.974081 | 11.780898 |  |
|          | H                     | 16.677842 | 24.761910 | 11.821518 |  |
|          | H                     | 15.503806 | 25.059519 | 13.114960 |  |
|          | C                     | 17.610573 | 23.640780 | 14.151932 |  |
|          | H                     | 17.244235 | 24.457532 | 14.785835 |  |
|          | H                     | 18.448030 | 24.020587 | 13.560098 |  |
|          | H                     | 17.989428 | 22.856244 | 14.817281 |  |
|          | C                     | 15.351865 | 22.581730 | 14.170748 |  |
|          | H                     | 14.998849 | 23.368105 | 14.850523 |  |
|          | H                     | 15.709244 | 21.740992 | 14.776517 |  |
|          | H                     | 14.497235 | 22.232287 | 13.580327 |  |
|          | C                     | 19.179173 | 24.278546 | 10.660397 |  |
|          | C                     | 20.001754 | 23.596430 | 11.432387 |  |
|          | C                     | 21.043904 | 24.010819 | 12.356791 |  |
|          | C                     | 21.529115 | 25.334579 | 12.369603 |  |
|          | H                     | 21.106091 | 26.054406 | 11.673581 |  |
|          | C                     | 22.532593 | 25.717453 | 13.251634 |  |
|          | H                     | 22.896137 | 26.742114 | 13.243286 |  |
|          | C                     | 23.070341 | 24.791825 | 14.149827 |  |
| H        | 23.853098             | 25.093251 | 14.841184 |           |  |
| C        | 22.596272             | 23.479818 | 14.156054 |           |  |
| H        | 23.006117             | 22.755687 | 14.855763 |           |  |
| C        | 21.597856             | 23.092747 | 13.266345 |           |  |
| H        | 21.226497             | 22.072417 | 13.274014 |           |  |
| U        | 18.701290             | 21.911502 | 10.212095 |           |  |
| C        | 18.223169             | 24.278476 | 9.763674  |           |  |
| C        | 17.400641             | 23.596230 | 8.991737  |           |  |

|            |   |           |           |           |  |
|------------|---|-----------|-----------|-----------|--|
|            | C | 16.358381 | 24.010481 | 8.067393  |  |
|            | C | 15.872956 | 25.334156 | 8.054584  |  |
|            | H | 16.295866 | 26.054067 | 8.750587  |  |
|            | C | 14.869389 | 25.716840 | 7.172566  |  |
|            | H | 14.505654 | 26.741434 | 7.180911  |  |
|            | C | 14.331790 | 24.791114 | 6.274388  |  |
|            | H | 13.548977 | 25.092410 | 5.583038  |  |
|            | C | 14.806077 | 23.479182 | 6.268154  |  |
|            | H | 14.396341 | 22.754988 | 5.568447  |  |
|            | C | 15.804566 | 23.092298 | 7.157851  |  |
|            | H | 16.176113 | 22.072035 | 7.150253  |  |
|            | C | 20.754465 | 20.098601 | 9.423436  |  |
|            | C | 21.235454 | 21.401233 | 9.114090  |  |
|            | H | 22.114693 | 21.858610 | 9.554134  |  |
|            | C | 20.480916 | 21.957632 | 8.043880  |  |
|            | C | 19.457024 | 21.016123 | 7.749445  |  |
|            | H | 18.708954 | 21.112915 | 6.970905  |  |
|            | C | 19.629394 | 19.880965 | 8.586985  |  |
|            | H | 19.034674 | 18.977041 | 8.544492  |  |
|            | C | 21.499290 | 19.073414 | 10.273933 |  |
|            | C | 22.876598 | 18.833563 | 9.617767  |  |
|            | H | 22.762184 | 18.484422 | 8.585218  |  |
|            | H | 23.438373 | 18.073454 | 10.175865 |  |
|            | H | 23.475397 | 19.750593 | 9.598464  |  |
|            | C | 20.760602 | 17.729898 | 10.318355 |  |
|            | H | 19.767074 | 17.822134 | 10.768210 |  |
|            | H | 21.330315 | 17.008687 | 10.916394 |  |
|            | H | 20.639666 | 17.307162 | 9.314349  |  |
|            | C | 21.726444 | 19.576607 | 11.707432 |  |
|            | H | 22.250543 | 20.538340 | 11.713678 |  |
|            | H | 22.335098 | 18.860715 | 12.274428 |  |
|            | H | 20.776737 | 19.699091 | 12.240834 |  |
|            | C | 20.927342 | 23.124592 | 7.166163  |  |
|            | C | 21.495352 | 24.293757 | 7.983894  |  |
|            | H | 22.309686 | 23.973796 | 8.643509  |  |
|            | H | 20.725123 | 24.761552 | 8.603063  |  |
|            | H | 21.899102 | 25.059385 | 7.309605  |  |
|            | C | 19.792555 | 23.640751 | 6.272294  |  |
|            | H | 20.159070 | 24.457446 | 5.638419  |  |
|            | H | 18.955077 | 24.020672 | 6.864022  |  |
|            | H | 19.413677 | 22.856251 | 5.606914  |  |
|            | C | 22.051155 | 22.581498 | 6.253747  |  |
|            | H | 22.404366 | 23.367878 | 5.574079  |  |
|            | H | 21.693759 | 21.740848 | 5.647868  |  |
|            | H | 22.905655 | 22.231911 | 6.844271  |  |
| <b>TS2</b> | C | 16.985870 | 20.052514 | 11.212086 |  |
|            | C | 16.793334 | 21.342571 | 11.794900 |  |
|            | H | 16.036656 | 22.056093 | 11.488006 |  |
|            | C | 17.675026 | 21.511003 | 12.896177 |  |
|            | C | 18.485650 | 20.344798 | 12.936224 |  |
|            | H | 19.249583 | 20.128486 | 13.674770 |  |
|            | C | 18.046652 | 19.446814 | 11.926353 |  |
|            | H | 18.441155 | 18.453322 | 11.757816 |  |
|            | C | 16.099889 | 19.410449 | 10.147822 |  |
|            | C | 14.654642 | 19.367497 | 10.683614 |  |
|            | H | 14.604890 | 18.812044 | 11.627073 |  |
|            | H | 13.992526 | 18.874901 | 9.960162  |  |
|            | H | 14.265350 | 20.375293 | 10.864751 |  |

|   |           |           |           |
|---|-----------|-----------|-----------|
| C | 16.552472 | 17.974456 | 9.850960  |
| H | 17.579593 | 17.947758 | 9.467825  |
| H | 15.902735 | 17.524946 | 9.090768  |
| H | 16.505477 | 17.344749 | 10.746648 |
| C | 16.115667 | 20.211759 | 8.834177  |
| H | 15.868506 | 21.267340 | 8.993503  |
| H | 15.386214 | 19.802068 | 8.124217  |
| H | 17.098359 | 20.156914 | 8.344822  |
| C | 17.567676 | 22.569256 | 13.987212 |
| C | 17.047181 | 23.908657 | 13.446915 |
| H | 16.061242 | 23.801018 | 12.980295 |
| H | 17.731651 | 24.334304 | 12.707600 |
| H | 16.943385 | 24.626364 | 14.269829 |
| C | 18.911401 | 22.796663 | 14.692793 |
| H | 18.794015 | 23.534826 | 15.495479 |
| H | 19.667831 | 23.171502 | 13.996602 |
| H | 19.288372 | 21.874525 | 15.150420 |
| C | 16.553734 | 22.035803 | 15.024995 |
| H | 16.430363 | 22.756711 | 15.843578 |
| H | 16.891416 | 21.085627 | 15.454715 |
| H | 15.572230 | 21.869035 | 14.566467 |
| C | 19.132173 | 23.830634 | 10.488469 |
| C | 20.179853 | 23.587994 | 11.265834 |
| C | 21.106558 | 24.541806 | 11.885966 |
| C | 20.998955 | 25.927859 | 11.660127 |
| H | 20.202519 | 26.290587 | 11.014651 |
| C | 21.890101 | 26.820440 | 12.245460 |
| H | 21.790564 | 27.886804 | 12.056523 |
| C | 22.910505 | 26.350431 | 13.076689 |
| H | 23.606422 | 27.048529 | 13.535418 |
| C | 23.030528 | 24.981417 | 13.315575 |
| H | 23.820427 | 24.608611 | 13.963401 |
| C | 22.139022 | 24.089115 | 12.724418 |
| H | 22.228253 | 23.023133 | 12.910952 |
| U | 19.270472 | 21.496927 | 10.561296 |
| C | 18.089645 | 24.124191 | 9.695531  |
| C | 17.107653 | 24.138520 | 8.930713  |
| C | 15.997677 | 24.392097 | 8.092865  |
| C | 14.719520 | 24.645195 | 8.642649  |
| H | 14.601319 | 24.654332 | 9.722572  |
| C | 13.628926 | 24.887444 | 7.815972  |
| H | 12.656124 | 25.082361 | 8.261200  |
| C | 13.773725 | 24.886041 | 6.426905  |
| H | 12.917766 | 25.076872 | 5.785282  |
| C | 15.031018 | 24.638772 | 5.871323  |
| H | 15.157570 | 24.638083 | 4.791239  |
| C | 16.130114 | 24.392284 | 6.685311  |
| H | 17.105269 | 24.202834 | 6.245673  |
| C | 21.543705 | 19.801228 | 10.509768 |
| C | 21.926012 | 21.015886 | 9.869249  |
| H | 22.683518 | 21.700187 | 10.231231 |
| C | 21.233050 | 21.151870 | 8.635225  |
| C | 20.364811 | 20.028460 | 8.539364  |
| H | 19.700980 | 19.802538 | 7.710539  |
| C | 20.559117 | 19.205184 | 9.678452  |
| H | 20.069609 | 18.254599 | 9.852735  |
| C | 22.284803 | 19.147111 | 11.671783 |
| C | 23.624105 | 18.613662 | 11.116289 |

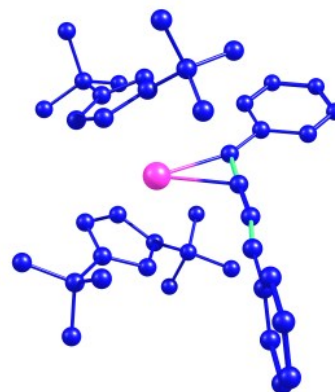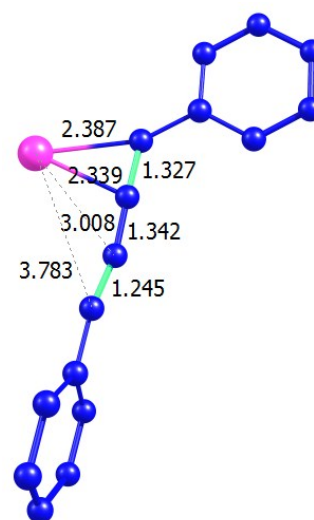

|           |   |           |           |           |  |
|-----------|---|-----------|-----------|-----------|--|
|           | H | 23.453280 | 17.882452 | 10.317977 |  |
|           | H | 24.202168 | 18.124655 | 11.911072 |  |
|           | H | 24.231624 | 19.426759 | 10.703574 |  |
|           | C | 21.506501 | 17.963475 | 12.261499 |  |
|           | H | 20.551964 | 18.279303 | 12.694065 |  |
|           | H | 22.093275 | 17.491334 | 13.058545 |  |
|           | H | 21.304511 | 17.195622 | 11.505964 |  |
|           | C | 22.590544 | 20.152849 | 12.791262 |  |
|           | H | 23.191456 | 20.991059 | 12.422588 |  |
|           | H | 23.159000 | 19.668177 | 13.594735 |  |
|           | H | 21.670754 | 20.558171 | 13.229593 |  |
|           | C | 21.521353 | 22.157742 | 7.526582  |  |
|           | C | 22.256716 | 23.394306 | 8.060819  |  |
|           | H | 23.230999 | 23.129934 | 8.487563  |  |
|           | H | 21.674669 | 23.906826 | 8.833770  |  |
|           | H | 22.438657 | 24.103208 | 7.244114  |  |
|           | C | 20.228909 | 22.607477 | 6.826046  |  |
|           | H | 20.464696 | 23.282862 | 5.994332  |  |
|           | H | 19.566596 | 23.149399 | 7.511666  |  |
|           | H | 19.674667 | 21.757976 | 6.409527  |  |
|           | C | 22.425064 | 21.457692 | 6.488548  |  |
|           | H | 22.676764 | 22.147425 | 5.672592  |  |
|           | H | 21.926440 | 20.583351 | 6.054674  |  |
|           | H | 23.359808 | 21.118265 | 6.949329  |  |
| <b>P2</b> | C | 17.952989 | 19.242629 | 12.430877 |  |
|           | C | 17.072848 | 20.355530 | 12.301432 |  |
|           | H | 16.158868 | 20.357595 | 11.715969 |  |
|           | C | 17.488319 | 21.408620 | 13.158913 |  |
|           | C | 18.702734 | 20.974879 | 13.757368 |  |
|           | H | 19.279554 | 21.525682 | 14.491202 |  |
|           | C | 18.975666 | 19.644620 | 13.325000 |  |
|           | H | 19.796138 | 19.029741 | 13.675134 |  |
|           | C | 17.681397 | 17.853085 | 11.864821 |  |
|           | C | 16.371545 | 17.328736 | 12.490839 |  |
|           | H | 16.449254 | 17.289556 | 13.583230 |  |
|           | H | 16.151879 | 16.316919 | 12.126828 |  |
|           | H | 15.521580 | 17.971642 | 12.237411 |  |
|           | C | 18.804857 | 16.872168 | 12.222219 |  |
|           | H | 19.770385 | 17.192107 | 11.817512 |  |
|           | H | 18.582868 | 15.879223 | 11.813687 |  |
|           | H | 18.910789 | 16.769511 | 13.308184 |  |
|           | C | 17.508949 | 17.900652 | 10.336800 |  |
|           | H | 16.692549 | 18.573038 | 10.046851 |  |
|           | H | 17.273827 | 16.905180 | 9.940233  |  |
|           | H | 18.427410 | 18.244428 | 9.845889  |  |
|           | C | 16.624797 | 22.590916 | 13.583732 |  |
|           | C | 15.782184 | 23.136079 | 12.421572 |  |
|           | H | 15.126222 | 22.365649 | 11.998839 |  |
|           | H | 16.412598 | 23.532059 | 11.619805 |  |
|           | H | 15.138584 | 23.950174 | 12.776955 |  |
|           | C | 17.456368 | 23.730988 | 14.185113 |  |
|           | H | 16.793925 | 24.539775 | 14.516945 |  |
|           | H | 18.159161 | 24.143822 | 13.456927 |  |
|           | H | 18.025446 | 23.396837 | 15.060617 |  |
|           | C | 15.665844 | 22.063876 | 14.676266 |  |
|           | H | 15.015571 | 22.872860 | 15.033166 |  |
|           | H | 16.224364 | 21.671632 | 15.534077 |  |
|           | H | 15.029518 | 21.258939 | 14.290783 |  |

|   |           |           |           |
|---|-----------|-----------|-----------|
| C | 18.993323 | 23.493874 | 10.670307 |
| C | 19.964686 | 23.472306 | 11.625011 |
| C | 20.701654 | 24.582248 | 12.232684 |
| C | 20.920899 | 25.795472 | 11.549787 |
| H | 20.512936 | 25.920333 | 10.550948 |
| C | 21.648872 | 26.827340 | 12.135420 |
| H | 21.813456 | 27.750112 | 11.583481 |
| C | 22.159154 | 26.686831 | 13.427453 |
| H | 22.722025 | 27.496501 | 13.885403 |
| C | 21.940252 | 25.498937 | 14.126013 |
| H | 22.329009 | 25.380210 | 15.134835 |
| C | 21.233246 | 24.457810 | 13.530146 |
| H | 21.070395 | 23.531278 | 14.073887 |
| U | 19.473043 | 21.276768 | 11.160443 |
| C | 18.334757 | 24.524822 | 10.004130 |
| C | 17.708388 | 25.366325 | 9.366727  |
| C | 17.014392 | 26.389442 | 8.664642  |
| C | 16.916547 | 27.689533 | 9.202033  |
| H | 17.378339 | 27.896702 | 10.163151 |
| C | 16.237770 | 28.689915 | 8.514706  |
| H | 16.169287 | 29.685988 | 8.944991  |
| C | 15.651395 | 28.421519 | 7.276312  |
| H | 15.125073 | 29.206684 | 6.739674  |
| C | 15.744053 | 27.139943 | 6.730506  |
| H | 15.289355 | 26.924604 | 5.766688  |
| C | 16.412621 | 26.131320 | 7.416323  |
| H | 16.481340 | 25.132359 | 6.994958  |
| C | 22.130724 | 20.314639 | 10.985751 |
| C | 22.056606 | 21.494257 | 10.190065 |
| H | 22.588209 | 22.416036 | 10.392356 |
| C | 21.246997 | 21.252395 | 9.044922  |
| C | 20.767320 | 19.919822 | 9.171356  |
| H | 20.148965 | 19.394508 | 8.449817  |
| C | 21.312332 | 19.348528 | 10.349728 |
| H | 21.168754 | 18.324836 | 10.671464 |
| C | 23.066413 | 20.093866 | 12.169054 |
| C | 24.514871 | 20.310295 | 11.684096 |
| H | 24.757456 | 19.630144 | 10.859557 |
| H | 25.223111 | 20.123738 | 12.501469 |
| H | 24.669201 | 21.336086 | 11.332112 |
| C | 22.948666 | 18.661927 | 12.707366 |
| H | 21.931959 | 18.439792 | 13.050081 |
| H | 23.625051 | 18.524180 | 13.559154 |
| H | 23.218562 | 17.922845 | 11.944116 |
| C | 22.773568 | 21.085213 | 13.305515 |
| H | 22.831907 | 22.122069 | 12.959305 |
| H | 23.497088 | 20.960268 | 14.121433 |
| H | 21.771693 | 20.923280 | 13.723828 |
| C | 21.114041 | 22.118026 | 7.796746  |
| C | 21.597968 | 23.551584 | 8.048203  |
| H | 22.656687 | 23.571375 | 8.331404  |
| H | 21.019799 | 24.034818 | 8.841111  |
| H | 21.488123 | 24.148234 | 7.134756  |
| C | 19.660959 | 22.155679 | 7.294672  |
| H | 19.597828 | 22.716078 | 6.353512  |
| H | 19.006372 | 22.653821 | 8.019474  |
| H | 19.273370 | 21.147854 | 7.100641  |
| C | 21.999185 | 21.488899 | 6.699034  |



|  |   |           |           |          |  |
|--|---|-----------|-----------|----------|--|
|  | H | 21.958223 | 22.091753 | 5.782670 |  |
|  | H | 21.667717 | 20.473430 | 6.453564 |  |
|  | H | 23.044613 | 21.432373 | 7.023626 |  |

**Table S4.** Frequencies of the stationary points optimized for the isomerization of **2**, obtained with B3PW91-PCM method.

| Species  | Frequencies (cm <sup>-1</sup> ) |      |      |      |      |      |      |      |      |      |      |
|----------|---------------------------------|------|------|------|------|------|------|------|------|------|------|
| <b>2</b> | 16                              | 20   | 24   | 27   | 35   | 38   | 42   | 49   | 52   | 53   | 57   |
|          | 59                              | 70   | 91   | 91   | 93   | 101  | 106  | 124  | 131  | 140  | 142  |
|          | 160                             | 169  | 178  | 183  | 186  | 187  | 200  | 219  | 229  | 231  | 231  |
|          | 232                             | 237  | 240  | 241  | 251  | 259  | 263  | 287  | 288  | 292  | 293  |
|          | 299                             | 303  | 303  | 304  | 331  | 334  | 343  | 347  | 348  | 356  | 357  |
|          | 364                             | 366  | 387  | 390  | 394  | 415  | 417  | 418  | 421  | 449  | 450  |
|          | 462                             | 473  | 479  | 480  | 500  | 501  | 506  | 514  | 541  | 555  | 557  |
|          | 586                             | 588  | 605  | 608  | 623  | 630  | 631  | 656  | 663  | 679  | 681  |
|          | 703                             | 704  | 759  | 770  | 774  | 778  | 804  | 818  | 820  | 825  | 826  |
|          | 831                             | 836  | 839  | 843  | 843  | 857  | 857  | 927  | 933  | 933  | 936  |
|          | 937                             | 938  | 944  | 947  | 951  | 954  | 957  | 957  | 958  | 959  | 968  |
|          | 968                             | 968  | 970  | 977  | 977  | 1000 | 1000 | 1015 | 1015 | 1045 | 1046 |
|          | 1047                            | 1051 | 1051 | 1057 | 1057 | 1058 | 1060 | 1060 | 1075 | 1079 | 1080 |
|          | 1110                            | 1110 | 1111 | 1112 | 1188 | 1188 | 1197 | 1201 | 1203 | 1206 | 1211 |
|          | 1212                            | 1217 | 1235 | 1235 | 1237 | 1238 | 1245 | 1246 | 1272 | 1272 | 1284 |
|          | 1285                            | 1334 | 1335 | 1335 | 1335 | 1366 | 1375 | 1380 | 1393 | 1398 | 1401 |
|          | 1403                            | 1411 | 1411 | 1412 | 1412 | 1417 | 1419 | 1423 | 1424 | 1441 | 1442 |
|          | 1446                            | 1446 | 1478 | 1480 | 1489 | 1489 | 1498 | 1500 | 1502 | 1502 | 1506 |
|          | 1506                            | 1507 | 1508 | 1511 | 1511 | 1511 | 1513 | 1521 | 1522 | 1523 | 1524 |
|          | 1524                            | 1524 | 1525 | 1527 | 1530 | 1533 | 1535 | 1540 | 1543 | 1544 | 1551 |
|          | 1551                            | 1635 | 1635 | 1660 | 1662 | 1694 | 1974 | 3045 | 3045 | 3047 | 3047 |
|          | 3050                            | 3050 | 3056 | 3056 | 3060 | 3060 | 3061 | 3062 | 3118 | 3118 | 3120 |
|          | 3120                            | 3123 | 3123 | 3123 | 3123 | 3126 | 3127 | 3129 | 3129 | 3134 | 3134 |
|          | 3138                            | 3138 | 3139 | 3139 | 3146 | 3149 | 3157 | 3157 | 3167 | 3167 | 3195 |
|          | 3195                            | 3203 | 3203 | 3213 | 3213 | 3221 | 3221 | 3229 | 3229 | 3242 | 3242 |
|          | 3246                            | 3246 | 3265 | 3266 |      |      |      |      |      |      |      |
|          | <b>TS2</b>                      | -64  | 16   | 18   | 24   | 25   | 31   | 35   | 38   | 45   | 51   |
| 58       |                                 | 67   | 72   | 78   | 86   | 87   | 92   | 107  | 109  | 125  | 142  |
| 144      |                                 | 171  | 181  | 190  | 193  | 201  | 207  | 223  | 228  | 238  | 242  |
| 246      |                                 | 248  | 249  | 253  | 257  | 260  | 272  | 274  | 289  | 295  | 296  |
| 298      |                                 | 302  | 306  | 328  | 330  | 344  | 345  | 347  | 352  | 358  | 363  |
| 366      |                                 | 368  | 386  | 391  | 397  | 409  | 417  | 419  | 422  | 428  | 446  |
| 449      |                                 | 464  | 467  | 469  | 482  | 498  | 500  | 504  | 508  | 526  | 558  |
| 561      |                                 | 577  | 612  | 612  | 621  | 630  | 632  | 666  | 671  | 684  | 690  |
| 701      |                                 | 706  | 711  | 759  | 775  | 779  | 782  | 827  | 828  | 830  | 833  |
| 835      |                                 | 839  | 841  | 844  | 845  | 859  | 861  | 905  | 934  | 936  | 939  |
| 943      |                                 | 944  | 944  | 946  | 952  | 954  | 955  | 957  | 959  | 959  | 966  |
| 966      |                                 | 968  | 972  | 975  | 978  | 987  | 990  | 1000 | 1007 | 1016 | 1047 |
| 1050     |                                 | 1051 | 1054 | 1055 | 1055 | 1058 | 1061 | 1067 | 1070 | 1082 | 1089 |
| 1109     |                                 | 1111 | 1115 | 1118 | 1187 | 1188 | 1199 | 1202 | 1204 | 1208 | 1214 |
| 1217     |                                 | 1225 | 1234 | 1236 | 1241 | 1243 | 1245 | 1246 | 1272 | 1273 | 1287 |
| 1288     |                                 | 1329 | 1333 | 1339 | 1341 | 1342 | 1372 | 1376 | 1397 | 1398 | 1402 |
| 1404     |                                 | 1411 | 1413 | 1415 | 1416 | 1419 | 1421 | 1425 | 1425 | 1444 | 1445 |
| 1451     |                                 | 1453 | 1482 | 1485 | 1487 | 1489 | 1501 | 1502 | 1502 | 1504 | 1506 |
| 1507     |                                 | 1508 | 1510 | 1511 | 1511 | 1513 | 1514 | 1521 | 1523 | 1523 | 1523 |
| 1524     |                                 | 1525 | 1530 | 1533 | 1535 | 1537 | 1541 | 1542 | 1547 | 1551 | 1562 |
| 1616     |                                 | 1622 | 1638 | 1658 | 1661 | 1808 | 2162 | 3045 | 3045 | 3047 | 3047 |
| 3048     |                                 | 3051 | 3053 | 3054 | 3054 | 3058 | 3059 | 3060 | 3113 | 3120 | 3120 |
| 3121     |                                 | 3121 | 3122 | 3123 | 3124 | 3126 | 3127 | 3127 | 3128 | 3131 | 3133 |
| 3133     |                                 | 3134 | 3136 | 3138 | 3138 | 3142 | 3146 | 3146 | 3149 | 3156 | 3191 |
| 3193     |                                 | 3199 | 3200 | 3209 | 3214 | 3218 | 3219 | 3225 | 3230 | 3230 | 3242 |
| 3244     |                                 | 3259 | 3261 | 3270 |      |      |      |      |      |      |      |

|           |      |      |      |      |      |      |      |      |      |      |      |
|-----------|------|------|------|------|------|------|------|------|------|------|------|
| <b>P2</b> | 11   | 18   | 20   | 23   | 33   | 34   | 51   | 56   | 60   | 64   | 71   |
|           | 74   | 78   | 82   | 84   | 85   | 101  | 106  | 107  | 117  | 138  | 141  |
|           | 147  | 172  | 186  | 195  | 197  | 200  | 206  | 218  | 226  | 230  | 230  |
|           | 241  | 244  | 250  | 252  | 253  | 271  | 271  | 291  | 293  | 294  | 296  |
|           | 299  | 304  | 330  | 334  | 337  | 344  | 348  | 352  | 354  | 358  | 361  |
|           | 363  | 381  | 385  | 399  | 408  | 412  | 414  | 421  | 428  | 432  | 448  |
|           | 450  | 467  | 482  | 484  | 484  | 501  | 503  | 505  | 553  | 557  | 559  |
|           | 574  | 609  | 614  | 615  | 627  | 632  | 661  | 665  | 687  | 691  | 695  |
|           | 704  | 710  | 742  | 771  | 773  | 778  | 781  | 825  | 828  | 831  | 835  |
|           | 840  | 843  | 846  | 855  | 857  | 859  | 867  | 929  | 933  | 937  | 938  |
|           | 941  | 942  | 946  | 946  | 951  | 954  | 955  | 956  | 958  | 959  | 967  |
|           | 967  | 970  | 970  | 973  | 976  | 997  | 999  | 1011 | 1014 | 1015 | 1049 |
|           | 1050 | 1051 | 1053 | 1055 | 1056 | 1060 | 1060 | 1063 | 1064 | 1077 | 1081 |
|           | 1110 | 1111 | 1115 | 1116 | 1187 | 1189 | 1202 | 1204 | 1204 | 1207 | 1213 |
|           | 1215 | 1219 | 1236 | 1240 | 1240 | 1243 | 1245 | 1247 | 1272 | 1273 | 1287 |
|           | 1288 | 1326 | 1334 | 1334 | 1336 | 1342 | 1372 | 1373 | 1396 | 1400 | 1403 |
|           | 1404 | 1410 | 1413 | 1415 | 1417 | 1418 | 1420 | 1423 | 1423 | 1444 | 1445 |
|           | 1446 | 1448 | 1478 | 1484 | 1487 | 1488 | 1501 | 1501 | 1502 | 1503 | 1507 |
|           | 1507 | 1508 | 1509 | 1511 | 1512 | 1512 | 1513 | 1522 | 1522 | 1523 | 1523 |
|           | 1524 | 1526 | 1527 | 1533 | 1535 | 1538 | 1538 | 1541 | 1546 | 1551 | 1558 |
|           | 1575 | 1585 | 1632 | 1634 | 1660 | 1667 | 2240 | 3044 | 3045 | 3047 | 3049 |
|           | 3049 | 3050 | 3054 | 3057 | 3057 | 3059 | 3060 | 3062 | 3117 | 3117 | 3118 |
|           | 3120 | 3121 | 3122 | 3123 | 3124 | 3125 | 3127 | 3130 | 3131 | 3131 | 3132 |
|           | 3134 | 3137 | 3137 | 3138 | 3144 | 3145 | 3156 | 3157 | 3158 | 3170 | 3189 |
|           | 3195 | 3197 | 3203 | 3211 | 3215 | 3219 | 3222 | 3225 | 3226 | 3227 | 3234 |
|           | 3245 | 3259 | 3261 | 3265 |      |      |      |      |      |      |      |

**Table S5.** The energies, enthalpies and free energies (in au at 298 K) and corresponding relative values (in kcal/mol ) for the isomerization of **2**, obtained with B3PW91-PCM method

| species    | E                  | H                 | G (sol)            |
|------------|--------------------|-------------------|--------------------|
| <b>2</b>   | -2107.417494(0.0)  | -2107.36972(0.0)  | -2107.474980(0.0)  |
| <b>TS2</b> | -2107.38487(20.5)  | -2107.33769(20.1) | -2107.441980(20.7) |
| <b>P2</b>  | -2107.393357(15.1) | -2107.34591(14.9) | -2107.451320(14.8) |

**Table S6.** The optimized Cartesian Coordinates (in Å) and structures (the hydrogen atoms omitted for clarity) of stationary points for **2**+ PhNCS, obtained with B3PW91-PCM method.

| Species  | Cartesian coordinates |           |           |           |  |
|----------|-----------------------|-----------|-----------|-----------|--|
| <b>2</b> | C                     | 16.647965 | 20.098854 | 11.000783 |  |
|          | C                     | 16.167171 | 21.401538 | 11.310215 |  |
|          | H                     | 15.287991 | 21.859080 | 10.870222 |  |
|          | C                     | 16.921833 | 21.957764 | 12.380417 |  |
|          | C                     | 17.945652 | 21.016127 | 12.674712 |  |
|          | H                     | 18.693772 | 21.112748 | 13.453224 |  |
|          | C                     | 17.773067 | 19.881024 | 11.837137 |  |
|          | H                     | 18.367649 | 18.977004 | 11.879525 |  |
|          | C                     | 15.902961 | 19.073808 | 10.150264 |  |
|          | C                     | 14.525690 | 18.834046 | 10.806539 |  |
|          | H                     | 14.640159 | 18.484998 | 11.839114 |  |
|          | H                     | 13.963860 | 18.073897 | 10.248548 |  |
|          | H                     | 13.926913 | 19.751091 | 10.825797 |  |
|          | C                     | 16.641507 | 17.730218 | 10.105644 |  |
|          | H                     | 17.635009 | 17.822419 | 9.655731  |  |
|          | H                     | 16.071680 | 17.009130 | 9.507565  |  |
|          | H                     | 16.762474 | 17.307358 | 11.109594 |  |
|          | C                     | 15.675722 | 19.577148 | 8.716831  |  |
|          | H                     | 15.151709 | 20.538928 | 8.710715  |  |
|          | H                     | 15.066951 | 18.861359 | 8.149832  |  |
|          | H                     | 16.625384 | 19.699591 | 8.183343  |  |
|          | C                     | 16.475620 | 23.124748 | 13.258207 |  |
|          | C                     | 15.907608 | 24.293990 | 12.440589 |  |
|          | H                     | 15.093315 | 23.974081 | 11.780898 |  |
|          | H                     | 16.677842 | 24.761910 | 11.821518 |  |
|          | H                     | 15.503806 | 25.059519 | 13.114960 |  |
|          | C                     | 17.610573 | 23.640780 | 14.151932 |  |
|          | H                     | 17.244235 | 24.457532 | 14.785835 |  |
|          | H                     | 18.448030 | 24.020587 | 13.560098 |  |
|          | H                     | 17.989428 | 22.856244 | 14.817281 |  |
|          | C                     | 15.351865 | 22.581730 | 14.170748 |  |
|          | H                     | 14.998849 | 23.368105 | 14.850523 |  |
|          | H                     | 15.709244 | 21.740992 | 14.776517 |  |
|          | H                     | 14.497235 | 22.232287 | 13.580327 |  |
|          | C                     | 19.179173 | 24.278546 | 10.660397 |  |
|          | C                     | 20.001754 | 23.596430 | 11.432387 |  |
|          | C                     | 21.043904 | 24.010819 | 12.356791 |  |
|          | C                     | 21.529115 | 25.334579 | 12.369603 |  |
|          | H                     | 21.106091 | 26.054406 | 11.673581 |  |
|          | C                     | 22.532593 | 25.717453 | 13.251634 |  |
| H        | 22.896137             | 26.742114 | 13.243286 |           |  |
| C        | 23.070341             | 24.791825 | 14.149827 |           |  |
| H        | 23.853098             | 25.093251 | 14.841184 |           |  |
| C        | 22.596272             | 23.479818 | 14.156054 |           |  |
| H        | 23.006117             | 22.755687 | 14.855763 |           |  |
| C        | 21.597856             | 23.092747 | 13.266345 |           |  |
| H        | 21.226497             | 22.072417 | 13.274014 |           |  |
| U        | 18.701290             | 21.911502 | 10.212095 |           |  |
| C        | 18.223169             | 24.278476 | 9.763674  |           |  |
| C        | 17.400641             | 23.596230 | 8.991737  |           |  |
| C        | 16.358381             | 24.010481 | 8.067393  |           |  |
| C        | 15.872956             | 25.334156 | 8.054584  |           |  |
| H        | 16.295866             | 26.054067 | 8.750587  |           |  |

|              |   |           |           |           |  |
|--------------|---|-----------|-----------|-----------|--|
|              | C | 14.869389 | 25.716840 | 7.172566  |  |
|              | H | 14.505654 | 26.741434 | 7.180911  |  |
|              | C | 14.331790 | 24.791114 | 6.274388  |  |
|              | H | 13.548977 | 25.092410 | 5.583038  |  |
|              | C | 14.806077 | 23.479182 | 6.268154  |  |
|              | H | 14.396341 | 22.754988 | 5.568447  |  |
|              | C | 15.804566 | 23.092298 | 7.157851  |  |
|              | H | 16.176113 | 22.072035 | 7.150253  |  |
|              | C | 20.754465 | 20.098601 | 9.423436  |  |
|              | C | 21.235454 | 21.401233 | 9.114090  |  |
|              | H | 22.114693 | 21.858610 | 9.554134  |  |
|              | C | 20.480916 | 21.957632 | 8.043880  |  |
|              | C | 19.457024 | 21.016123 | 7.749445  |  |
|              | H | 18.708954 | 21.112915 | 6.970905  |  |
|              | C | 19.629394 | 19.880965 | 8.586985  |  |
|              | H | 19.034674 | 18.977041 | 8.544492  |  |
|              | C | 21.499290 | 19.073414 | 10.273933 |  |
|              | C | 22.876598 | 18.833563 | 9.617767  |  |
|              | H | 22.762184 | 18.484422 | 8.585218  |  |
|              | H | 23.438373 | 18.073454 | 10.175865 |  |
|              | H | 23.475397 | 19.750593 | 9.598464  |  |
|              | C | 20.760602 | 17.729898 | 10.318355 |  |
|              | H | 19.767074 | 17.822134 | 10.768210 |  |
|              | H | 21.330315 | 17.008687 | 10.916394 |  |
|              | H | 20.639666 | 17.307162 | 9.314349  |  |
|              | C | 21.726444 | 19.576607 | 11.707432 |  |
|              | H | 22.250543 | 20.538340 | 11.713678 |  |
|              | H | 22.335098 | 18.860715 | 12.274428 |  |
|              | H | 20.776737 | 19.699091 | 12.240834 |  |
|              | C | 20.927342 | 23.124592 | 7.166163  |  |
|              | C | 21.495352 | 24.293757 | 7.983894  |  |
|              | H | 22.309686 | 23.973796 | 8.643509  |  |
|              | H | 20.725123 | 24.761552 | 8.603063  |  |
|              | H | 21.899102 | 25.059385 | 7.309605  |  |
|              | C | 19.792555 | 23.640751 | 6.272294  |  |
|              | H | 20.159070 | 24.457446 | 5.638419  |  |
|              | H | 18.955077 | 24.020672 | 6.864022  |  |
|              | H | 19.413677 | 22.856251 | 5.606914  |  |
|              | C | 22.051155 | 22.581498 | 6.253747  |  |
|              | H | 22.404366 | 23.367878 | 5.574079  |  |
|              | H | 21.693759 | 21.740848 | 5.647868  |  |
|              | H | 22.905655 | 22.231911 | 6.844271  |  |
| <b>PhNCS</b> | C | 3.223564  | -0.157964 | 0.000078  |  |
|              | C | 2.671463  | 1.123540  | 0.000039  |  |
|              | C | 1.290846  | 1.295916  | -0.000026 |  |
|              | C | 0.456977  | 0.170211  | -0.000054 |  |
|              | C | 1.004509  | -1.121731 | -0.000018 |  |
|              | C | 2.386710  | -1.275395 | 0.000047  |  |
|              | H | 4.302282  | -0.286301 | 0.000130  |  |
|              | H | 3.318320  | 1.996434  | 0.000060  |  |
|              | H | 0.847617  | 2.286745  | -0.000059 |  |
|              | H | 0.343858  | -1.983224 | -0.000050 |  |
|              | H | 2.811281  | -2.275567 | 0.000073  |  |
|              | N | -0.907795 | 0.343445  | -0.000139 |  |
|              | C | -2.071320 | 0.098944  | -0.000199 |  |
|              | S | -3.643481 | -0.137983 | 0.000077  |  |

| Atom | X         | Y         | Z         |
|------|-----------|-----------|-----------|
| C    | 10.254515 | 18.826032 | 10.022356 |
| C    | 9.414201  | 19.968301 | 9.880843  |
| H    | 8.491089  | 19.989585 | 9.312752  |
| C    | 9.889923  | 21.025287 | 10.700562 |
| C    | 11.102187 | 20.564154 | 11.279893 |
| H    | 11.718445 | 21.114360 | 11.981432 |
| C    | 11.314364 | 19.214773 | 10.878976 |
| H    | 12.116993 | 18.578932 | 11.228873 |
| C    | 9.917766  | 17.426045 | 9.517128  |
| C    | 8.550393  | 17.019272 | 10.105946 |
| H    | 8.572550  | 17.048385 | 11.201297 |
| H    | 8.289858  | 15.998966 | 9.796315  |
| H    | 7.751818  | 17.688394 | 9.767573  |
| C    | 10.956335 | 16.400111 | 9.988259  |
| H    | 11.958848 | 16.631424 | 9.614867  |
| H    | 10.688843 | 15.400411 | 9.626108  |
| H    | 11.004660 | 16.357442 | 11.082529 |
| C    | 9.820395  | 17.388739 | 7.982740  |
| H    | 9.067411  | 18.093430 | 7.613539  |
| H    | 9.541709  | 16.385006 | 7.637042  |
| H    | 10.778106 | 17.647775 | 7.514253  |
| C    | 9.082343  | 22.244161 | 11.131481 |
| C    | 8.210641  | 22.791790 | 9.993574  |
| H    | 7.511486  | 22.036248 | 9.617305  |
| H    | 8.817965  | 23.144072 | 9.155295  |
| H    | 7.611657  | 23.636668 | 10.355765 |
| C    | 9.972515  | 23.368493 | 11.675481 |
| H    | 9.349774  | 24.206993 | 12.010626 |
| H    | 10.662907 | 23.738498 | 10.913398 |
| H    | 10.561731 | 23.036104 | 12.537964 |
| C    | 8.151639  | 21.771017 | 12.272273 |
| H    | 7.538668  | 22.606556 | 12.634555 |
| H    | 8.731257  | 21.381899 | 13.117440 |
| H    | 7.478228  | 20.976744 | 11.930250 |
| C    | 11.474199 | 23.042648 | 8.175250  |
| C    | 12.442322 | 22.925795 | 9.091858  |
| C    | 13.257286 | 23.991840 | 9.683820  |
| C    | 13.458631 | 25.218377 | 9.022003  |
| H    | 12.986433 | 25.377387 | 8.055711  |
| C    | 14.251219 | 26.214513 | 9.583708  |
| H    | 14.400273 | 27.150297 | 9.049790  |
| C    | 14.847623 | 26.019643 | 10.831705 |
| H    | 15.462018 | 26.800764 | 11.272550 |
| C    | 14.648153 | 24.816135 | 11.508520 |
| H    | 15.102745 | 24.657556 | 12.483724 |
| C    | 13.872007 | 23.811538 | 10.935154 |
| H    | 13.717878 | 22.874469 | 11.462377 |
| U    | 11.826594 | 20.717125 | 8.651364  |
| C    | 10.676058 | 23.796701 | 7.390106  |
| C    | 9.832298  | 24.157295 | 6.540043  |
| C    | 9.054610  | 25.099072 | 5.802254  |
| C    | 8.588009  | 26.278950 | 6.418619  |
| H    | 8.832612  | 26.459978 | 7.461299  |
| C    | 7.828935  | 27.197953 | 5.702647  |
| H    | 7.478238  | 28.102535 | 6.193348  |
| C    | 7.525007  | 26.967624 | 4.359003  |
| H    | 6.936542  | 27.690899 | 3.800387  |
| C    | 7.979712  | 25.803673 | 3.737704  |

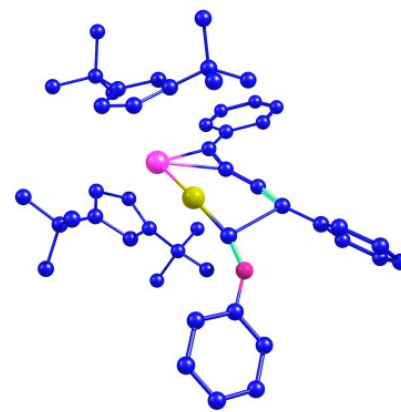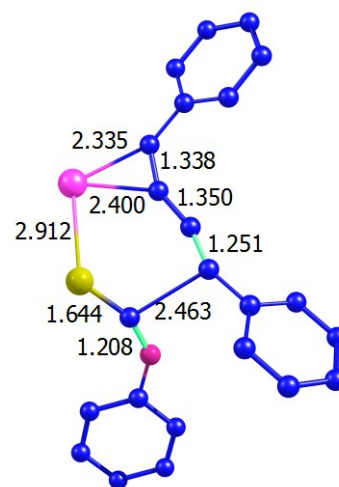

|          |   |           |           |           |  |
|----------|---|-----------|-----------|-----------|--|
|          | H | 7.747001  | 25.617566 | 2.692216  |  |
|          | C | 8.726784  | 24.871829 | 4.451416  |  |
|          | H | 9.075602  | 23.963874 | 3.968734  |  |
|          | C | 14.395521 | 19.543171 | 8.706710  |  |
|          | C | 14.516351 | 20.727972 | 7.927626  |  |
|          | H | 15.134539 | 21.580107 | 8.186720  |  |
|          | C | 13.837300 | 20.563640 | 6.686194  |  |
|          | C | 13.199218 | 19.295857 | 6.747980  |  |
|          | H | 12.616303 | 18.837712 | 5.956201  |  |
|          | C | 13.543858 | 18.672807 | 7.979037  |  |
|          | H | 13.258179 | 17.670471 | 8.272674  |  |
|          | C | 15.253142 | 19.203607 | 9.922880  |  |
|          | C | 16.732367 | 19.257514 | 9.482520  |  |
|          | H | 16.921440 | 18.562155 | 8.656772  |  |
|          | H | 17.388426 | 18.982786 | 10.318464 |  |
|          | H | 17.013260 | 20.262121 | 9.148842  |  |
|          | C | 14.969537 | 17.784267 | 10.431936 |  |
|          | H | 13.929771 | 17.659442 | 10.749726 |  |
|          | H | 15.609128 | 17.560835 | 11.294001 |  |
|          | H | 15.178330 | 17.035123 | 9.659448  |  |
|          | C | 15.052581 | 20.209997 | 11.066159 |  |
|          | H | 15.286275 | 21.229690 | 10.742672 |  |
|          | H | 15.710757 | 19.967723 | 11.910343 |  |
|          | H | 14.019240 | 20.197714 | 11.431517 |  |
|          | C | 14.089323 | 21.406172 | 5.436369  |  |
|          | C | 13.844990 | 22.903740 | 5.666547  |  |
|          | H | 14.399936 | 23.275863 | 6.534798  |  |
|          | H | 12.783902 | 23.111773 | 5.830194  |  |
|          | H | 14.173654 | 23.474620 | 4.788570  |  |
|          | C | 13.236924 | 20.934966 | 4.250731  |  |
|          | H | 13.468448 | 21.539977 | 3.365675  |  |
|          | H | 12.166982 | 21.037662 | 4.456226  |  |
|          | H | 13.442291 | 19.888109 | 3.997107  |  |
|          | C | 15.575550 | 21.204186 | 5.061314  |  |
|          | H | 15.809959 | 21.745461 | 4.135539  |  |
|          | H | 15.801250 | 20.143131 | 4.902700  |  |
|          | H | 16.239980 | 21.576639 | 5.848824  |  |
|          | C | 6.442575  | 21.700701 | 5.958237  |  |
|          | C | 5.339162  | 22.558633 | 5.899408  |  |
|          | H | 5.501941  | 23.629078 | 5.976555  |  |
|          | C | 4.062525  | 22.026239 | 5.743915  |  |
|          | H | 3.205023  | 22.692153 | 5.699950  |  |
|          | C | 3.883490  | 20.645977 | 5.642237  |  |
|          | H | 2.885645  | 20.233852 | 5.519148  |  |
|          | C | 4.988764  | 19.794135 | 5.696754  |  |
|          | H | 4.852980  | 18.718887 | 5.614843  |  |
|          | C | 6.269934  | 20.312967 | 5.854866  |  |
|          | H | 7.136669  | 19.659110 | 5.893237  |  |
|          | N | 7.710414  | 22.260670 | 6.111826  |  |
|          | C | 8.856473  | 21.912485 | 6.269240  |  |
|          | S | 10.107138 | 20.845485 | 6.305071  |  |
| <b>4</b> | C | 10.159081 | 19.137757 | 10.440585 |  |
|          | C | 9.260149  | 20.236497 | 10.323530 |  |
|          | H | 8.272455  | 20.180343 | 9.883410  |  |
|          | C | 9.801800  | 21.383114 | 10.960738 |  |
|          | C | 11.098956 | 21.013617 | 11.406990 |  |
|          | H | 11.780745 | 21.643871 | 11.964618 |  |
|          | C | 11.313159 | 19.641409 | 11.093967 |  |

|   |           |           |           |
|---|-----------|-----------|-----------|
| H | 12.184070 | 19.065892 | 11.378993 |
| C | 9.789442  | 17.682047 | 10.161875 |
| C | 8.566537  | 17.338151 | 11.040433 |
| H | 8.786883  | 17.500223 | 12.101883 |
| H | 8.288313  | 16.285293 | 10.905617 |
| H | 7.698192  | 17.951275 | 10.777112 |
| C | 10.925856 | 16.728447 | 10.549735 |
| H | 11.827824 | 16.900255 | 9.954983  |
| H | 10.614092 | 15.690628 | 10.383628 |
| H | 11.191602 | 16.830163 | 11.608529 |
| C | 9.410138  | 17.453350 | 8.689862  |
| H | 8.577911  | 18.094186 | 8.381790  |
| H | 9.109145  | 16.409825 | 8.533011  |
| H | 10.252588 | 17.661059 | 8.019104  |
| C | 9.004405  | 22.618821 | 11.366656 |
| C | 8.049532  | 23.081498 | 10.256791 |
| H | 7.360233  | 22.285786 | 9.954227  |
| H | 8.594741  | 23.407800 | 9.366240  |
| H | 7.444018  | 23.924672 | 10.611481 |
| C | 9.910717  | 23.786272 | 11.777597 |
| H | 9.297213  | 24.632038 | 12.110668 |
| H | 10.534453 | 24.127584 | 10.946626 |
| H | 10.569851 | 23.513839 | 12.609899 |
| C | 8.160165  | 22.209717 | 12.595928 |
| H | 7.570674  | 23.063922 | 12.952946 |
| H | 8.799771  | 21.868599 | 13.418227 |
| H | 7.467592  | 21.397974 | 12.346865 |
| C | 11.440723 | 23.489457 | 8.305732  |
| C | 12.361097 | 23.206646 | 9.191195  |
| C | 13.336640 | 24.069168 | 9.836563  |
| C | 13.633364 | 25.341113 | 9.301526  |
| H | 13.124220 | 25.662952 | 8.396898  |
| C | 14.565673 | 26.171110 | 9.911307  |
| H | 14.784623 | 27.144347 | 9.479418  |
| C | 15.215583 | 25.760192 | 11.078045 |
| H | 15.941689 | 26.412025 | 11.556693 |
| C | 14.926838 | 24.510434 | 11.625924 |
| H | 15.424132 | 24.186298 | 12.536454 |
| C | 14.003041 | 23.671799 | 11.008392 |
| H | 13.780509 | 22.701351 | 11.437754 |
| U | 11.430198 | 20.940083 | 8.711690  |
| C | 10.469983 | 23.159285 | 7.504893  |
| C | 9.488453  | 23.335552 | 6.598997  |
| C | 9.176871  | 24.673181 | 6.045754  |
| C | 9.334967  | 25.816570 | 6.847572  |
| H | 9.642641  | 25.700918 | 7.883376  |
| C | 9.085779  | 27.087285 | 6.339419  |
| H | 9.204263  | 27.956159 | 6.982104  |
| C | 8.678758  | 27.244910 | 5.013910  |
| H | 8.483917  | 28.237154 | 4.614895  |
| C | 8.521870  | 26.118811 | 4.206384  |
| H | 8.210027  | 26.230194 | 3.170847  |
| C | 8.762686  | 24.844514 | 4.713970  |
| H | 8.633632  | 23.975944 | 4.079768  |
| C | 13.985000 | 19.671426 | 8.544718  |
| C | 14.063023 | 20.857194 | 7.758150  |
| H | 14.740691 | 21.680909 | 7.949820  |
| C | 13.247009 | 20.727577 | 6.598839  |

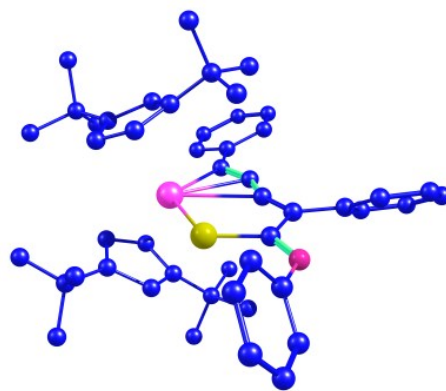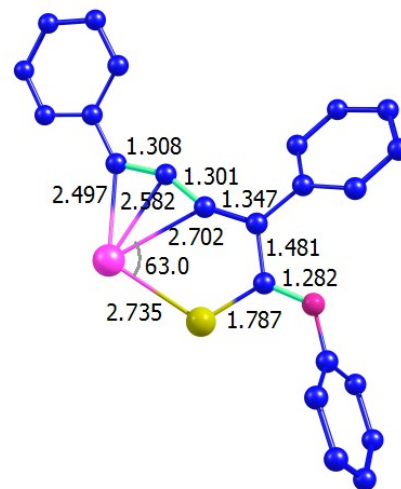



|   |           |           |           |
|---|-----------|-----------|-----------|
| C | 12.574963 | 19.482592 | 6.726363  |
| H | 11.868947 | 19.064360 | 6.019677  |
| C | 13.021453 | 18.842671 | 7.913124  |
| H | 12.729592 | 17.849323 | 8.230081  |
| C | 15.016157 | 19.257034 | 9.593232  |
| C | 16.377294 | 19.162598 | 8.865875  |
| H | 16.328179 | 18.449846 | 8.034952  |
| H | 17.155862 | 18.824433 | 9.561605  |
| H | 16.682706 | 20.133476 | 8.461229  |
| C | 14.711873 | 17.875301 | 10.184843 |
| H | 13.755607 | 17.852811 | 10.714982 |
| H | 15.494000 | 17.598352 | 10.901476 |
| H | 14.687122 | 17.102910 | 9.407695  |
| C | 15.149911 | 20.280092 | 10.728320 |
| H | 15.375399 | 21.279256 | 10.342103 |
| H | 15.964520 | 19.992108 | 11.404417 |
| H | 14.231581 | 20.343105 | 11.322707 |
| C | 13.384985 | 21.554176 | 5.321516  |
| C | 13.712226 | 23.027225 | 5.603342  |
| H | 14.620764 | 23.136798 | 6.206167  |
| H | 12.893058 | 23.529424 | 6.125357  |
| H | 13.881874 | 23.555576 | 4.657399  |
| C | 12.135072 | 21.478258 | 4.435191  |
| H | 12.313635 | 22.018533 | 3.497607  |
| H | 11.267257 | 21.927309 | 4.925470  |
| H | 11.882397 | 20.444199 | 4.175917  |
| C | 14.569341 | 20.937666 | 4.540463  |
| H | 14.729025 | 21.481746 | 3.600600  |
| H | 14.376665 | 19.886459 | 4.297556  |
| H | 15.495956 | 20.985467 | 5.123892  |
| C | 6.935820  | 21.127139 | 5.036318  |
| C | 5.549168  | 21.161290 | 5.256713  |
| H | 5.131490  | 21.990943 | 5.820435  |
| C | 4.732938  | 20.144917 | 4.769692  |
| H | 3.663388  | 20.178187 | 4.963418  |
| C | 5.276816  | 19.097618 | 4.023842  |
| H | 4.635745  | 18.312115 | 3.632257  |
| C | 6.649836  | 19.075042 | 3.775814  |
| H | 7.083185  | 18.270394 | 3.186260  |
| C | 7.478029  | 20.074301 | 4.280164  |
| H | 8.545318  | 20.058590 | 4.081360  |
| N | 7.703087  | 22.204429 | 5.480569  |
| C | 8.737157  | 22.113470 | 6.232121  |
| S | 9.338073  | 20.606208 | 6.981521  |

**Table S7.** Frequencies of the stationary points optimized for 2+ PhNCS, obtained with B3PW91-PCM method.

| Species      | Frequencies (cm <sup>-1</sup> ) |      |      |      |      |      |      |      |      |      |      |
|--------------|---------------------------------|------|------|------|------|------|------|------|------|------|------|
| <b>2</b>     | 16                              | 20   | 24   | 27   | 35   | 38   | 42   | 49   | 52   | 53   | 57   |
|              | 59                              | 70   | 91   | 91   | 93   | 101  | 106  | 124  | 131  | 140  | 142  |
|              | 160                             | 169  | 178  | 183  | 186  | 187  | 200  | 219  | 229  | 231  | 231  |
|              | 232                             | 237  | 240  | 241  | 251  | 259  | 263  | 287  | 288  | 292  | 293  |
|              | 299                             | 303  | 303  | 304  | 331  | 334  | 343  | 347  | 348  | 356  | 357  |
|              | 364                             | 366  | 387  | 390  | 394  | 415  | 417  | 418  | 421  | 449  | 450  |
|              | 462                             | 473  | 479  | 480  | 500  | 501  | 506  | 514  | 541  | 555  | 557  |
|              | 586                             | 588  | 605  | 608  | 623  | 630  | 631  | 656  | 663  | 679  | 681  |
|              | 703                             | 704  | 759  | 770  | 774  | 778  | 804  | 818  | 820  | 825  | 826  |
|              | 831                             | 836  | 839  | 843  | 843  | 857  | 857  | 927  | 933  | 933  | 936  |
|              | 937                             | 938  | 944  | 947  | 951  | 954  | 957  | 957  | 958  | 959  | 968  |
|              | 968                             | 968  | 970  | 977  | 977  | 1000 | 1000 | 1015 | 1015 | 1045 | 1046 |
|              | 1047                            | 1051 | 1051 | 1057 | 1057 | 1058 | 1060 | 1060 | 1075 | 1079 | 1080 |
|              | 1110                            | 1110 | 1111 | 1112 | 1188 | 1188 | 1197 | 1201 | 1203 | 1206 | 1211 |
|              | 1212                            | 1217 | 1235 | 1235 | 1237 | 1238 | 1245 | 1246 | 1272 | 1272 | 1284 |
|              | 1285                            | 1334 | 1335 | 1335 | 1335 | 1366 | 1375 | 1380 | 1393 | 1398 | 1401 |
|              | 1403                            | 1411 | 1411 | 1412 | 1412 | 1417 | 1419 | 1423 | 1424 | 1441 | 1442 |
|              | 1446                            | 1446 | 1478 | 1480 | 1489 | 1489 | 1498 | 1500 | 1502 | 1502 | 1506 |
|              | 1506                            | 1507 | 1508 | 1511 | 1511 | 1511 | 1513 | 1521 | 1522 | 1523 | 1524 |
|              | 1524                            | 1524 | 1525 | 1527 | 1530 | 1533 | 1535 | 1540 | 1543 | 1544 | 1551 |
|              | 1551                            | 1635 | 1635 | 1660 | 1662 | 1694 | 1974 | 3045 | 3045 | 3047 | 3047 |
|              | 3050                            | 3050 | 3056 | 3056 | 3060 | 3060 | 3061 | 3062 | 3118 | 3118 | 3120 |
|              | 3120                            | 3123 | 3123 | 3123 | 3123 | 3126 | 3127 | 3129 | 3129 | 3134 | 3134 |
|              | 3138                            | 3138 | 3139 | 3139 | 3146 | 3149 | 3157 | 3157 | 3167 | 3167 | 3195 |
| 3195         | 3203                            | 3203 | 3213 | 3213 | 3221 | 3221 | 3229 | 3229 | 3242 | 3242 |      |
| 3246         | 3246                            | 3265 | 3266 |      |      |      |      |      |      |      |      |
| <b>PhNCS</b> | 34                              | 60   | 248  | 362  | 394  | 415  | 435  | 479  | 506  | 627  | 698  |
|              | 699                             | 770  | 846  | 926  | 949  | 975  | 1003 | 1016 | 1059 | 1112 | 1192 |
|              | 1203                            | 1306 | 1342 | 1377 | 1499 | 1540 | 1645 | 1665 | 2226 | 3207 | 3216 |
|              | 3226                            | 3234 | 3238 |      |      |      |      |      |      |      |      |
| <b>TS4</b>   | -274                            | 10   | 16   | 22   | 22   | 25   | 27   | 29   | 33   | 39   | 47   |
|              | 49                              | 52   | 58   | 62   | 67   | 72   | 72   | 79   | 85   | 90   | 95   |
|              | 101                             | 107  | 111  | 116  | 132  | 139  | 145  | 151  | 158  | 172  | 178  |
|              | 196                             | 197  | 203  | 210  | 223  | 229  | 231  | 234  | 238  | 243  | 245  |
|              | 247                             | 254  | 256  | 268  | 270  | 277  | 293  | 295  | 298  | 300  | 308  |
|              | 318                             | 325  | 332  | 335  | 346  | 350  | 350  | 353  | 360  | 364  | 365  |
|              | 368                             | 370  | 387  | 394  | 409  | 413  | 415  | 418  | 419  | 422  | 447  |
|              | 448                             | 460  | 460  | 471  | 479  | 481  | 493  | 500  | 504  | 508  | 525  |
|              | 534                             | 548  | 559  | 561  | 575  | 601  | 606  | 610  | 623  | 627  | 630  |
|              | 665                             | 670  | 671  | 685  | 692  | 701  | 702  | 704  | 710  | 728  | 769  |
|              | 771                             | 774  | 776  | 778  | 826  | 829  | 829  | 834  | 839  | 841  | 844  |
|              | 853                             | 856  | 856  | 858  | 861  | 873  | 929  | 933  | 933  | 934  | 936  |
|              | 939                             | 944  | 946  | 947  | 953  | 954  | 956  | 956  | 958  | 959  | 967  |
|              | 967                             | 969  | 972  | 974  | 977  | 978  | 995  | 998  | 999  | 1004 | 1013 |
|              | 1015                            | 1017 | 1049 | 1050 | 1052 | 1052 | 1056 | 1057 | 1057 | 1059 | 1059 |
|              | 1062                            | 1064 | 1081 | 1082 | 1110 | 1110 | 1111 | 1112 | 1115 | 1186 | 1189 |
|              | 1190                            | 1198 | 1202 | 1202 | 1204 | 1207 | 1214 | 1214 | 1227 | 1235 | 1235 |
|              | 1238                            | 1239 | 1246 | 1247 | 1254 | 1272 | 1273 | 1285 | 1287 | 1319 | 1334 |
|              | 1335                            | 1335 | 1337 | 1342 | 1373 | 1374 | 1379 | 1395 | 1401 | 1403 | 1404 |
|              | 1413                            | 1413 | 1416 | 1417 | 1418 | 1420 | 1423 | 1424 | 1444 | 1445 | 1447 |
| 1449         | 1479                            | 1480 | 1487 | 1488 | 1498 | 1501 | 1502 | 1503 | 1503 | 1506 |      |
| 1507         | 1508                            | 1510 | 1511 | 1511 | 1512 | 1513 | 1523 | 1523 | 1524 | 1524 |      |

|          |      |      |      |      |      |      |      |      |      |      |      |
|----------|------|------|------|------|------|------|------|------|------|------|------|
|          | 1526 | 1526 | 1531 | 1532 | 1535 | 1537 | 1538 | 1538 | 1541 | 1545 | 1550 |
|          | 1553 | 1590 | 1631 | 1636 | 1647 | 1659 | 1661 | 1662 | 1722 | 2004 | 2106 |
|          | 3044 | 3045 | 3048 | 3049 | 3052 | 3054 | 3054 | 3056 | 3057 | 3061 | 3061 |
|          | 3061 | 3119 | 3119 | 3121 | 3122 | 3122 | 3124 | 3125 | 3126 | 3126 | 3126 |
|          | 3130 | 3130 | 3132 | 3135 | 3138 | 3139 | 3145 | 3146 | 3147 | 3148 | 3150 |
|          | 3158 | 3163 | 3167 | 3190 | 3196 | 3197 | 3203 | 3205 | 3209 | 3212 | 3216 |
|          | 3217 | 3222 | 3223 | 3225 | 3228 | 3229 | 3238 | 3238 | 3246 | 3247 | 3248 |
|          | 3265 | 3275 |      |      |      |      |      |      |      |      |      |
| <b>4</b> | 12   | 18   | 21   | 25   | 29   | 31   | 38   | 40   | 45   | 46   | 47   |
|          | 51   | 53   | 63   | 70   | 72   | 75   | 82   | 91   | 93   | 97   | 104  |
|          | 108  | 115  | 129  | 142  | 144  | 153  | 168  | 172  | 176  | 185  | 187  |
|          | 195  | 205  | 218  | 224  | 229  | 233  | 238  | 243  | 244  | 247  | 249  |
|          | 254  | 262  | 268  | 279  | 285  | 289  | 298  | 298  | 300  | 301  | 305  |
|          | 314  | 334  | 337  | 343  | 349  | 352  | 355  | 357  | 363  | 365  | 370  |
|          | 384  | 390  | 395  | 396  | 412  | 416  | 419  | 420  | 426  | 431  | 447  |
|          | 449  | 459  | 474  | 479  | 482  | 499  | 500  | 513  | 521  | 547  | 558  |
|          | 559  | 580  | 584  | 604  | 607  | 617  | 628  | 628  | 631  | 646  | 661  |
|          | 664  | 669  | 678  | 683  | 689  | 704  | 705  | 706  | 770  | 774  | 776  |
|          | 779  | 783  | 801  | 826  | 829  | 830  | 833  | 835  | 843  | 846  | 847  |
|          | 851  | 859  | 861  | 864  | 869  | 916  | 929  | 932  | 935  | 937  | 939  |
|          | 941  | 946  | 948  | 953  | 954  | 958  | 958  | 959  | 959  | 964  | 967  |
|          | 967  | 968  | 971  | 971  | 981  | 987  | 997  | 1005 | 1012 | 1015 | 1015 |
|          | 1047 | 1048 | 1050 | 1052 | 1054 | 1054 | 1056 | 1057 | 1058 | 1058 | 1060 |
|          | 1076 | 1080 | 1084 | 1109 | 1112 | 1115 | 1116 | 1119 | 1142 | 1185 | 1190 |
|          | 1190 | 1200 | 1202 | 1204 | 1208 | 1215 | 1216 | 1217 | 1233 | 1234 | 1234 |
|          | 1238 | 1245 | 1246 | 1252 | 1273 | 1274 | 1285 | 1285 | 1299 | 1323 | 1332 |
|          | 1333 | 1337 | 1340 | 1352 | 1374 | 1377 | 1378 | 1394 | 1398 | 1403 | 1406 |
|          | 1413 | 1414 | 1415 | 1417 | 1421 | 1423 | 1424 | 1426 | 1446 | 1448 | 1449 |
|          | 1451 | 1476 | 1479 | 1489 | 1490 | 1494 | 1500 | 1500 | 1502 | 1503 | 1505 |
|          | 1506 | 1506 | 1507 | 1507 | 1509 | 1511 | 1514 | 1521 | 1523 | 1524 | 1525 |
|          | 1526 | 1528 | 1530 | 1533 | 1533 | 1534 | 1535 | 1535 | 1539 | 1542 | 1545 |
|          | 1550 | 1554 | 1634 | 1638 | 1639 | 1647 | 1660 | 1665 | 1671 | 1696 | 1995 |
|          | 3046 | 3047 | 3049 | 3049 | 3052 | 3056 | 3058 | 3059 | 3060 | 3063 | 3063 |
|          | 3064 | 3120 | 3121 | 3122 | 3124 | 3124 | 3126 | 3126 | 3127 | 3129 | 3130 |
|          | 3130 | 3131 | 3134 | 3135 | 3139 | 3140 | 3145 | 3146 | 3149 | 3154 | 3157 |
|          | 3157 | 3157 | 3160 | 3192 | 3195 | 3199 | 3200 | 3203 | 3207 | 3214 | 3214 |
|          | 3216 | 3222 | 3222 | 3225 | 3228 | 3242 | 3253 | 3256 | 3256 | 3256 | 3266 |
|          | 3271 | 3275 |      |      |      |      |      |      |      |      |      |

**Table S8.** The energies, enthalpies and free energies (in au at 298 K) and corresponding relative values (in kcal/mol ) for **2+PhNCS**, obtained with B3PW91-PCM method

| species        | E                   | H                  | G (sol)             |
|----------------|---------------------|--------------------|---------------------|
| <b>2</b>       | -2107.417494(0.0)   | -2107.36972(0.0)   | -2107.474980(0.0)   |
| <b>PhNCS</b>   | -722.407403         | -722.398896        | -722.426730         |
| <b>2+PhNCS</b> | -2829.824897(0.0)   | -2829.768616(0.0)  | -2829.901710(0.0)   |
| <b>TS4</b>     | -2829.781603(27.2)  | -2829.72552(27.0)  | -2829.848040(33.7)  |
| <b>4</b>       | -2829.866021(-25.8) | -2829.81032(-26.2) | -2829.931030(-18.4) |

**Table S9.** The energies, zero-point (vibrational) energy (ZPE) and entropies (at 298 K) for **2+PhNCS**, obtained with B3PW91-PCM(+D3)/6-31G(d) method.

| species        | E <sup>a</sup> | ZPE <sup>b</sup> | S (sol) <sup>c</sup> | G <sup>d</sup>      |
|----------------|----------------|------------------|----------------------|---------------------|
| <b>2</b>       | -2108.401824   | 0.822061         | 243.163              | -2107.637244(0.0)   |
| <b>PhNCS</b>   | -722.518593    | 0.101896         | 61.209               | -722.436023         |
| <b>2+PhNCS</b> | -2830.920417   | 0.923957         | 304.372              | -2830.073267(0.0)   |
| <b>TS4</b>     | -2830.896865   | 0.925418         | 287.278              | -2830.037885(22.2)  |
| <b>4</b>       | -2830.985653   | 0.928257         | 281.786              | -2830.122403(-30.8) |

*a.* Values (in a.u.) calculated with B3PW91-PCM+D3/6-31G(d)+ECP60MWB method.

*b.* Values (in a.u.) calculated with B3PW91-PCM/6-31G(d)+ ECP60MWB method.

*c.* Values (in cal·mol<sup>-1</sup>·K<sup>-1</sup>) calculated with B3PW91-PCM/6-31G(d)+ ECP60MWB method.

*d.* Values (in a.u.) calculated with B3PW91-PCM/6-31G(d)+ ECP60MWB method, the values in parathesis are relative Gibbs free energies.

**Table S10.** The optimized Cartesian Coordinates (in Å) and structure (the hydrogen atoms omitted for clarity) of ( $\eta^5\text{-C}_5\text{Me}_5$ )<sub>2</sub>U( $\eta^2\text{-C}_4\text{TMS}_2$ ), ( $\eta^5\text{-C}_5\text{Me}_5$ )<sub>2</sub>U( $\eta^2\text{-C}_4\text{Ph}_2$ ) and [ $\eta^5\text{-1,3-(Me}_3\text{C)}_2\text{C}_5\text{H}_3$ ]<sub>2</sub>U[ $\eta^4\text{-C}_4(\text{SiMe}_3)_2$ ] (**3**), obtained with B3PW91-PCM method.

| Species                                              | Cartesian coordinates |           |           |           |                                                                                      |
|------------------------------------------------------|-----------------------|-----------|-----------|-----------|--------------------------------------------------------------------------------------|
| Cp* <sub>2</sub> U(C <sub>4</sub> TMS <sub>2</sub> ) | C                     | 5.279645  | 2.797718  | 12.903115 | 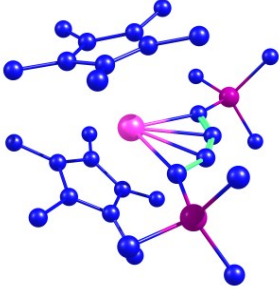  |
|                                                      | C                     | 6.349673  | 3.698678  | 12.635168 |                                                                                      |
|                                                      | C                     | 6.424861  | 3.895294  | 11.227506 |                                                                                      |
|                                                      | C                     | 5.396043  | 3.120874  | 10.620876 |                                                                                      |
|                                                      | C                     | 4.694368  | 2.436076  | 11.654799 |                                                                                      |
|                                                      | C                     | 4.767015  | 2.429702  | 14.265619 |                                                                                      |
|                                                      | H                     | 4.092923  | 3.204964  | 14.657543 |                                                                                      |
|                                                      | H                     | 5.579977  | 2.311054  | 14.990116 |                                                                                      |
|                                                      | H                     | 4.207729  | 1.489451  | 14.248745 |                                                                                      |
|                                                      | C                     | 7.122889  | 4.475290  | 13.658368 |                                                                                      |
|                                                      | H                     | 8.128769  | 4.729704  | 13.308771 |                                                                                      |
|                                                      | H                     | 7.226907  | 3.919806  | 14.594120 |                                                                                      |
|                                                      | H                     | 6.616425  | 5.422969  | 13.895465 |                                                                                      |
|                                                      | C                     | 7.323747  | 4.894908  | 10.557127 |                                                                                      |
|                                                      | H                     | 7.309396  | 4.794967  | 9.468322  |                                                                                      |
|                                                      | H                     | 8.367593  | 4.807792  | 10.883243 |                                                                                      |
|                                                      | H                     | 7.007727  | 5.921985  | 10.788753 |                                                                                      |
|                                                      | C                     | 4.949554  | 3.172628  | 9.187511  |                                                                                      |
|                                                      | H                     | 4.737892  | 2.180180  | 8.771742  |                                                                                      |
|                                                      | H                     | 5.691955  | 3.648528  | 8.541993  |                                                                                      |
|                                                      | H                     | 4.021495  | 3.754960  | 9.094884  |                                                                                      |
|                                                      | C                     | 3.430824  | 1.652336  | 11.451398 |  |
|                                                      | H                     | 2.558536  | 2.320225  | 11.390287 |                                                                                      |
|                                                      | H                     | 3.247735  | 0.954577  | 12.272632 |                                                                                      |
|                                                      | H                     | 3.450363  | 1.071069  | 10.522558 |                                                                                      |
|                                                      | C                     | 8.371541  | -0.844929 | 10.312987 |                                                                                      |
|                                                      | C                     | 9.456877  | -0.042521 | 10.759886 |                                                                                      |
|                                                      | C                     | 9.408339  | 1.194535  | 10.058461 |                                                                                      |
|                                                      | C                     | 8.304174  | 1.147807  | 9.155681  |                                                                                      |
|                                                      | C                     | 7.653652  | -0.109104 | 9.327504  |                                                                                      |
|                                                      | C                     | 8.143556  | -2.280829 | 10.683839 |                                                                                      |
|                                                      | H                     | 8.795705  | -2.944194 | 10.096607 |                                                                                      |
|                                                      | H                     | 7.111219  | -2.589303 | 10.492604 |                                                                                      |
|                                                      | H                     | 8.353619  | -2.472957 | 11.741296 |                                                                                      |
|                                                      | C                     | 10.549848 | -0.506015 | 11.676436 |                                                                                      |
|                                                      | H                     | 11.270899 | -1.135919 | 11.135171 |                                                                                      |
|                                                      | H                     | 10.165572 | -1.099174 | 12.512825 |                                                                                      |
|                                                      | H                     | 11.108943 | 0.333864  | 12.098833 |                                                                                      |
|                                                      | C                     | 10.441075 | 2.284062  | 10.102847 |                                                                                      |
|                                                      | H                     | 10.006877 | 3.273100  | 9.919448  |                                                                                      |
| H                                                    | 10.954535             | 2.326006  | 11.068278 |           |                                                                                      |
| H                                                    | 11.213211             | 2.130178  | 9.334689  |           |                                                                                      |
| C                                                    | 8.084602              | 2.114320  | 8.028230  |           |                                                                                      |
| H                                                    | 8.782350              | 1.901129  | 7.205035  |           |                                                                                      |
| H                                                    | 8.256881              | 3.153609  | 8.324656  |           |                                                                                      |
| H                                                    | 7.075335              | 2.050016  | 7.613884  |           |                                                                                      |
| C                                                    | 6.497536              | -0.633663 | 8.522782  |           |                                                                                      |
| H                                                    | 6.012176              | 0.159255  | 7.944866  |           |                                                                                      |
| H                                                    | 5.729010              | -1.094032 | 9.154190  |           |                                                                                      |
| H                                                    | 6.823819              | -1.399847 | 7.805363  |           |                                                                                      |
| C                                                    | 10.999254             | 3.270636  | 14.193520 |           |                                                                                      |
| H                                                    | 11.740317             | 3.623172  | 14.921717 |           |                                                                                      |

|                                                     |    |           |           |           |                                                                                       |
|-----------------------------------------------------|----|-----------|-----------|-----------|---------------------------------------------------------------------------------------|
|                                                     | H  | 10.408364 | 4.136822  | 13.875393 |                                                                                       |
|                                                     | H  | 11.547942 | 2.899588  | 13.320276 |                                                                                       |
|                                                     | C  | 11.013878 | 0.450345  | 15.426625 |                                                                                       |
|                                                     | H  | 11.526901 | 0.028816  | 14.555700 |                                                                                       |
|                                                     | H  | 10.418223 | -0.348323 | 15.883913 |                                                                                       |
|                                                     | H  | 11.779733 | 0.756228  | 16.150838 |                                                                                       |
|                                                     | C  | 9.135623  | 2.588065  | 16.554622 |                                                                                       |
|                                                     | H  | 9.916276  | 2.800037  | 17.296490 |                                                                                       |
|                                                     | H  | 8.450030  | 1.852234  | 16.990645 |                                                                                       |
|                                                     | H  | 8.576228  | 3.515109  | 16.389996 |                                                                                       |
|                                                     | C  | 8.576963  | 1.358813  | 13.777516 |                                                                                       |
|                                                     | C  | 7.721929  | 0.379993  | 13.941408 |                                                                                       |
|                                                     | C  | 6.728266  | -0.376453 | 13.520054 |                                                                                       |
|                                                     | C  | 5.844105  | -0.722407 | 12.617652 |                                                                                       |
|                                                     | C  | 3.261475  | -1.681946 | 13.986685 |                                                                                       |
|                                                     | H  | 2.676794  | -0.802109 | 13.696296 |                                                                                       |
|                                                     | H  | 3.710349  | -1.479744 | 14.966079 |                                                                                       |
|                                                     | H  | 2.562530  | -2.520011 | 14.103304 |                                                                                       |
|                                                     | C  | 3.763531  | -2.416927 | 11.037299 |                                                                                       |
|                                                     | H  | 2.974469  | -3.172959 | 11.135998 |                                                                                       |
|                                                     | H  | 4.476001  | -2.783931 | 10.289359 |                                                                                       |
|                                                     | H  | 3.301600  | -1.504101 | 10.644528 |                                                                                       |
|                                                     | C  | 5.452884  | -3.706655 | 13.268344 |                                                                                       |
|                                                     | H  | 5.921113  | -3.569547 | 14.250081 |                                                                                       |
|                                                     | H  | 6.234528  | -4.014002 | 12.564941 |                                                                                       |
|                                                     | H  | 4.732396  | -4.530393 | 13.350020 |                                                                                       |
|                                                     | Si | 9.920090  | 1.924480  | 14.963036 |                                                                                       |
|                                                     | Si | 4.590804  | -2.117212 | 12.709073 |                                                                                       |
|                                                     | U  | 7.155607  | 1.214469  | 11.714112 |                                                                                       |
| Cp* <sub>2</sub> U(C <sub>4</sub> Ph <sub>2</sub> ) | C  | 6.543237  | 13.855547 | 14.644952 | 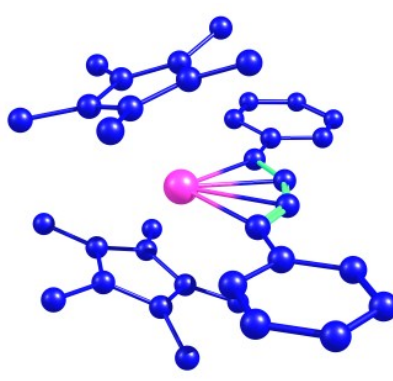 |
|                                                     | C  | 7.592038  | 13.585839 | 15.567991 |                                                                                       |
|                                                     | C  | 7.117422  | 13.895347 | 16.876523 |                                                                                       |
|                                                     | C  | 5.773757  | 14.356945 | 16.762174 |                                                                                       |
|                                                     | C  | 5.416607  | 14.318412 | 15.381729 |                                                                                       |
|                                                     | C  | 6.674650  | 13.847718 | 13.150314 |                                                                                       |
|                                                     | H  | 7.078953  | 14.806753 | 12.793904 |                                                                                       |
|                                                     | H  | 5.713284  | 13.697555 | 12.650513 |                                                                                       |
|                                                     | H  | 7.349093  | 13.060213 | 12.800441 |                                                                                       |
|                                                     | C  | 8.994116  | 13.193735 | 15.200997 |                                                                                       |
|                                                     | H  | 9.015807  | 12.488372 | 14.362739 |                                                                                       |
|                                                     | H  | 9.516211  | 12.721656 | 16.038479 |                                                                                       |
|                                                     | H  | 9.582565  | 14.072375 | 14.899935 |                                                                                       |
|                                                     | C  | 7.945055  | 13.935627 | 18.129179 |                                                                                       |
|                                                     | H  | 8.748366  | 13.193625 | 18.115949 |                                                                                       |
|                                                     | H  | 7.344583  | 13.753453 | 19.027635 |                                                                                       |
|                                                     | H  | 8.413694  | 14.922616 | 18.257304 |                                                                                       |
|                                                     | C  | 4.995603  | 15.010129 | 17.868121 |                                                                                       |
|                                                     | H  | 5.112989  | 14.492960 | 18.827089 |                                                                                       |
|                                                     | H  | 3.926071  | 15.061082 | 17.648104 |                                                                                       |
|                                                     | H  | 5.340133  | 16.042874 | 18.024303 |                                                                                       |
|                                                     | C  | 4.144012  | 14.833637 | 14.770321 |                                                                                       |
|                                                     | H  | 4.295231  | 15.826880 | 14.323973 |                                                                                       |
|                                                     | H  | 3.344764  | 14.935367 | 15.510284 |                                                                                       |
|                                                     | H  | 3.770758  | 14.184983 | 13.967877 |                                                                                       |
|                                                     | C  | 4.502814  | 9.715488  | 17.703405 |                                                                                       |
|                                                     | C  | 4.024548  | 10.949009 | 18.228924 |                                                                                       |
|                                                     | C  | 3.181800  | 11.550493 | 17.250165 |                                                                                       |
|                                                     | C  | 3.155191  | 10.692296 | 16.111152 |                                                                                       |

|          |                                                                                                                                                                                                                                                                                                                                                                                                                                                                                                                                                                                                                                                                                                                                                                                                                                                                                                                                                                                                                                                                                                                                                                                                                                                                                                                                                                                                                                                                                                                                                                                                                                                                           |  |
|----------|---------------------------------------------------------------------------------------------------------------------------------------------------------------------------------------------------------------------------------------------------------------------------------------------------------------------------------------------------------------------------------------------------------------------------------------------------------------------------------------------------------------------------------------------------------------------------------------------------------------------------------------------------------------------------------------------------------------------------------------------------------------------------------------------------------------------------------------------------------------------------------------------------------------------------------------------------------------------------------------------------------------------------------------------------------------------------------------------------------------------------------------------------------------------------------------------------------------------------------------------------------------------------------------------------------------------------------------------------------------------------------------------------------------------------------------------------------------------------------------------------------------------------------------------------------------------------------------------------------------------------------------------------------------------------|--|
|          | C 3.967579 9.556503 16.393145<br>C 5.272340 8.671236 18.458318<br>H 5.925031 9.105506 19.220905<br>H 5.903174 8.070091 17.796035<br>H 4.586605 7.980223 18.970420<br>C 4.241290 11.440112 19.631807<br>H 3.500118 11.009966 20.320974<br>H 4.150548 12.528504 19.708638<br>H 5.227917 11.160753 20.017338<br>C 2.259338 12.714777 17.467824<br>H 2.145289 13.336779 16.573529<br>H 2.596347 13.360828 18.282686<br>H 1.252699 12.361505 17.735780<br>C 2.263427 10.873969 14.915796<br>H 2.623853 10.316443 14.046517<br>H 2.173445 11.926448 14.620384<br>H 1.243876 10.519878 15.128529<br>C 4.111819 8.330722 15.537926<br>H 5.110784 7.888605 15.619287<br>H 3.390031 7.556851 15.836733<br>H 3.938983 8.548845 14.479959<br>C 8.434249 10.556704 19.391573<br>H 7.605241 11.229362 19.592853<br>C 9.306784 10.197571 20.415088<br>H 9.153911 10.589075 21.417750<br>C 10.374895 9.338624 20.154891<br>H 11.057576 9.057683 20.952745<br>C 10.562602 8.841175 18.862520<br>H 11.393030 8.171175 18.653149<br>C 9.689969 9.197850 17.841312<br>H 9.833646 8.809625 16.836054<br>C 8.604536 10.064610 18.084967<br>C 7.680497 10.441944 17.028239<br>C 7.600800 10.078145 15.761995<br>C 6.990210 10.157455 14.606147<br>C 6.009057 10.656201 13.878674<br>C 5.619395 10.436976 12.495769<br>C 4.521379 11.123235 11.946210<br>H 3.974577 11.822303 12.572989<br>C 4.133734 10.918956 10.624816<br>H 3.282370 11.461554 10.221347<br>C 4.835813 10.021227 9.820127<br>H 4.533960 9.860286 8.788368<br>C 5.929812 9.330014 10.347721<br>H 6.481370 8.629009 9.725868<br>C 6.317088 9.534441 11.666742<br>H 7.167644 8.996961 12.078480<br>U 5.731391 11.647975 16.116951 |  |
| <b>3</b> | C 7.530638 -0.680483 4.795585<br>C 7.113921 0.583035 4.304663<br>H 6.375120 1.218251 4.776117<br>C 7.724113 0.846751 3.048164<br>C 8.590044 -0.250234 2.791910<br>H 9.192806 -0.390846 1.901967<br>C 8.479397 -1.179038 3.861498<br>H 8.970894 -2.143398 3.909077<br>C 6.886423 -1.465214 5.938493<br>C 6.319126 -2.775218 5.352820                                                                                                                                                                                                                                                                                                                                                                                                                                                                                                                                                                                                                                                                                                                                                                                                                                                                                                                                                                                                                                                                                                                                                                                                                                                                                                                                       |  |

|    |           |           |           |
|----|-----------|-----------|-----------|
| H  | 7.114084  | -3.407095 | 4.941508  |
| H  | 5.604250  | -2.567964 | 4.548583  |
| H  | 5.802325  | -3.349599 | 6.132374  |
| C  | 5.722636  | -0.676881 | 6.555021  |
| H  | 5.262874  | -1.257269 | 7.363864  |
| H  | 4.945525  | -0.463934 | 5.812026  |
| H  | 6.058385  | 0.275782  | 6.978682  |
| C  | 7.881010  | -1.822535 | 7.053378  |
| H  | 8.730548  | -2.393606 | 6.665463  |
| H  | 7.390842  | -2.435070 | 7.820999  |
| H  | 8.268395  | -0.922466 | 7.543758  |
| C  | 7.241763  | 1.890438  | 2.045854  |
| C  | 5.930785  | 1.350357  | 1.430490  |
| H  | 6.095395  | 0.381152  | 0.945612  |
| H  | 5.544171  | 2.049005  | 0.676895  |
| H  | 5.160020  | 1.216488  | 2.197999  |
| C  | 6.945069  | 3.244217  | 2.707706  |
| H  | 6.218025  | 3.147279  | 3.521334  |
| H  | 6.522381  | 3.936599  | 1.968835  |
| H  | 7.852768  | 3.699112  | 3.115527  |
| C  | 8.253325  | 2.100036  | 0.914280  |
| H  | 9.205523  | 2.466373  | 1.308667  |
| H  | 7.871567  | 2.837931  | 0.198049  |
| H  | 8.442560  | 1.172151  | 0.362175  |
| C  | 10.267794 | 3.303087  | 4.326942  |
| C  | 10.937396 | 2.675113  | 3.393139  |
| C  | 11.315169 | 5.005713  | 1.406588  |
| H  | 10.312491 | 4.873687  | 0.984508  |
| H  | 11.953446 | 5.437695  | 0.625550  |
| H  | 11.240031 | 5.733860  | 2.222622  |
| C  | 12.180976 | 2.158255  | 0.590795  |
| H  | 11.221657 | 2.002352  | 0.085514  |
| H  | 12.547874 | 1.179348  | 0.918119  |
| H  | 12.888170 | 2.545514  | -0.153472 |
| C  | 13.747876 | 3.692159  | 2.757688  |
| H  | 14.399879 | 4.142099  | 1.998275  |
| H  | 14.228736 | 2.770804  | 3.104266  |
| H  | 13.692212 | 4.383412  | 3.606248  |
| Si | 12.029514 | 3.369925  | 2.032340  |
| U  | 9.884146  | 0.954958  | 4.863912  |
| C  | 9.499028  | 3.303481  | 5.398103  |
| C  | 8.830130  | 2.675910  | 6.332681  |
| C  | 8.456231  | 5.003349  | 8.323006  |
| H  | 9.457344  | 4.867006  | 8.747387  |
| H  | 7.817555  | 5.436328  | 9.103159  |
| H  | 8.536090  | 5.732568  | 7.508377  |
| C  | 7.580181  | 2.158072  | 9.132525  |
| H  | 8.540955  | 1.988343  | 9.630591  |
| H  | 7.197453  | 1.184786  | 8.806643  |
| H  | 6.883827  | 2.553783  | 9.882572  |
| C  | 6.021379  | 3.700297  | 6.965571  |
| H  | 5.369713  | 4.150527  | 7.725121  |
| H  | 5.537916  | 2.781401  | 6.616007  |
| H  | 6.080470  | 4.393405  | 6.118772  |
| Si | 7.737599  | 3.371069  | 7.692817  |
| C  | 12.238250 | -0.679422 | 4.932388  |
| C  | 12.654312 | 0.584133  | 5.423784  |
| H  | 13.392944 | 1.219806  | 4.952682  |

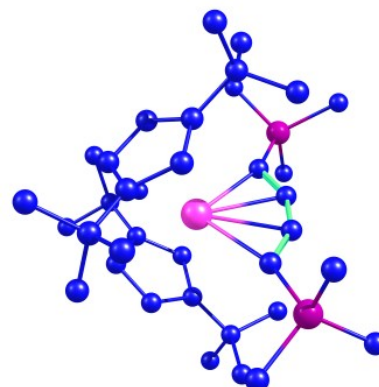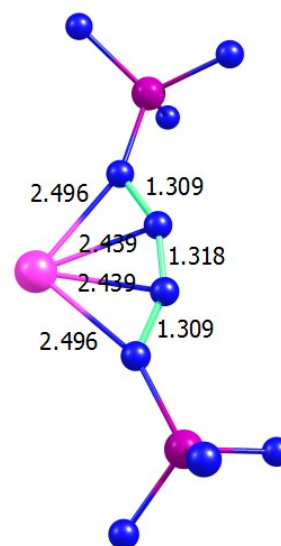



|   |           |           |          |
|---|-----------|-----------|----------|
| C | 12.043675 | 0.847148  | 6.680221 |
| C | 11.178154 | -0.250277 | 6.935867 |
| H | 10.575205 | -0.391468 | 7.825567 |
| C | 11.289569 | -1.178755 | 5.866095 |
| H | 10.798838 | -2.143518 | 5.818265 |
| C | 12.883235 | -1.463804 | 3.789779 |
| C | 13.459268 | -2.768994 | 4.377758 |
| H | 12.668829 | -3.403758 | 4.793301 |
| H | 14.175318 | -2.555298 | 5.179262 |
| H | 13.976995 | -3.342992 | 3.598529 |
| C | 14.040752 | -0.671084 | 3.167199 |
| H | 14.499333 | -1.250052 | 2.356694 |
| H | 14.820356 | -0.454163 | 3.906425 |
| H | 13.698660 | 0.279781  | 2.744671 |
| C | 11.886866 | -1.829778 | 2.679340 |
| H | 11.040951 | -2.403081 | 3.071897 |
| H | 12.377407 | -2.443107 | 1.912614 |
| H | 11.493952 | -0.933373 | 2.186668 |
| C | 12.525094 | 1.890821  | 7.682977 |
| C | 13.836803 | 1.351880  | 8.297749 |
| H | 13.673392 | 0.382197  | 8.782079 |
| H | 14.222774 | 2.050506  | 9.051698 |
| H | 14.607592 | 1.219352  | 7.530029 |
| C | 12.820116 | 3.245241  | 7.021690 |
| H | 13.547112 | 3.149426  | 6.207882 |
| H | 13.242171 | 3.937812  | 7.760747 |
| H | 11.911810 | 3.699233  | 6.614211 |
| C | 11.513589 | 2.098642  | 8.814976 |
| H | 10.560823 | 2.464182  | 8.421215 |
| H | 11.894785 | 2.836535  | 9.531495 |
| H | 11.325643 | 1.170223  | 9.366626 |
